# Supplementary material
Source: PubMed Central journal article supplement (PMC8730738)
Supplement: mmc1.pdf [file mmc1.pdf]

Supplementary Figure 1

- Geography
- America
  - Central Asia
  - Caucasus
  - Europe
  - South Asia
  - Southeast Asia Island
  - Southeast Asia Mainland
  - Siberia
  - West Asia

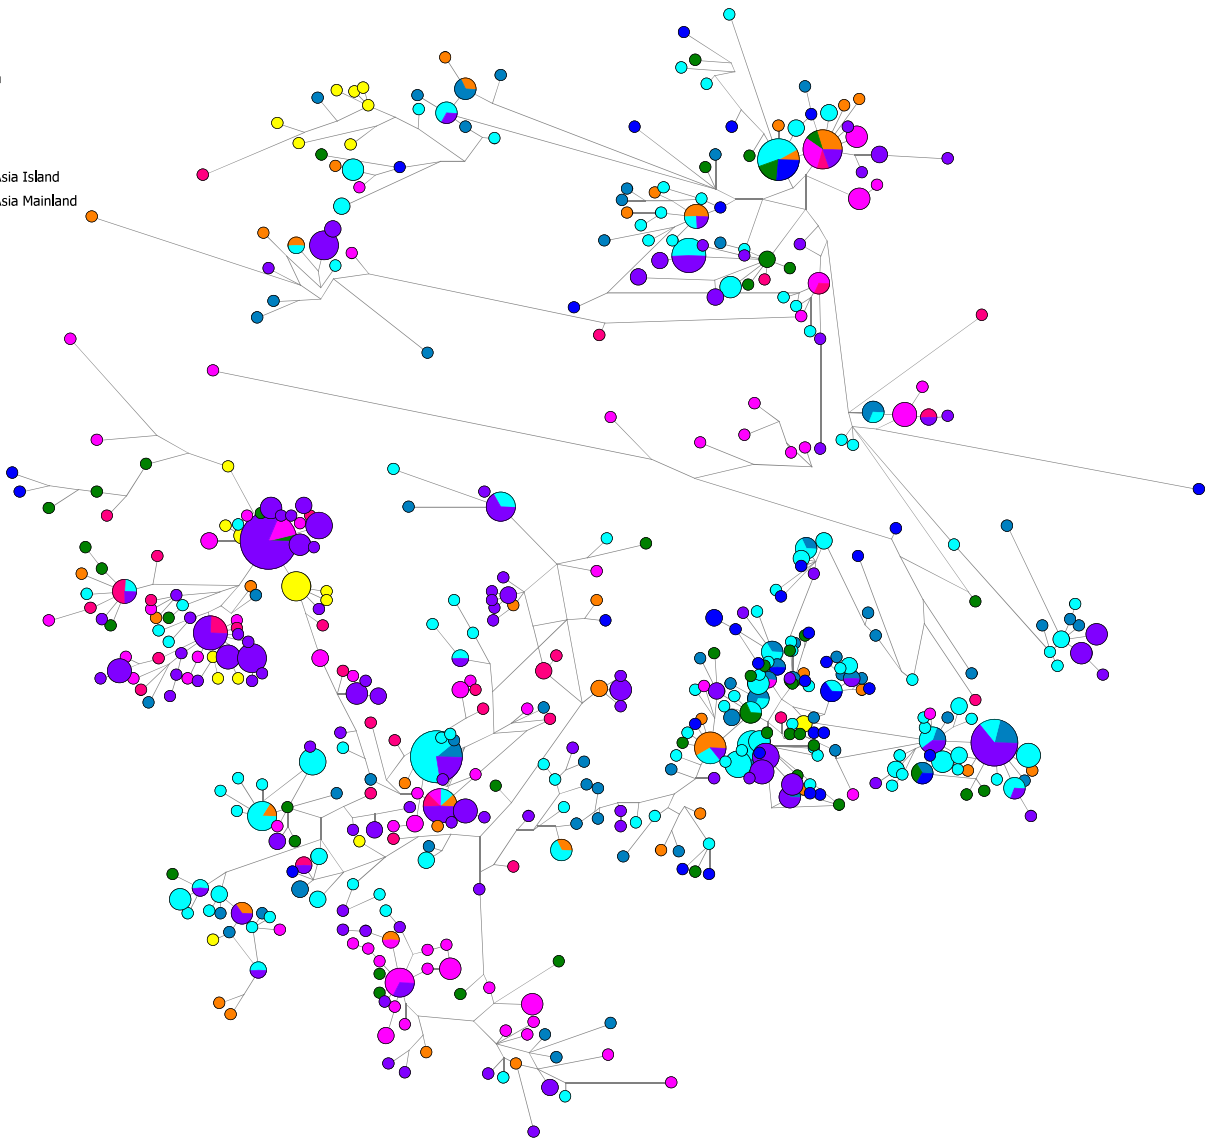



Supplementary Figure 3

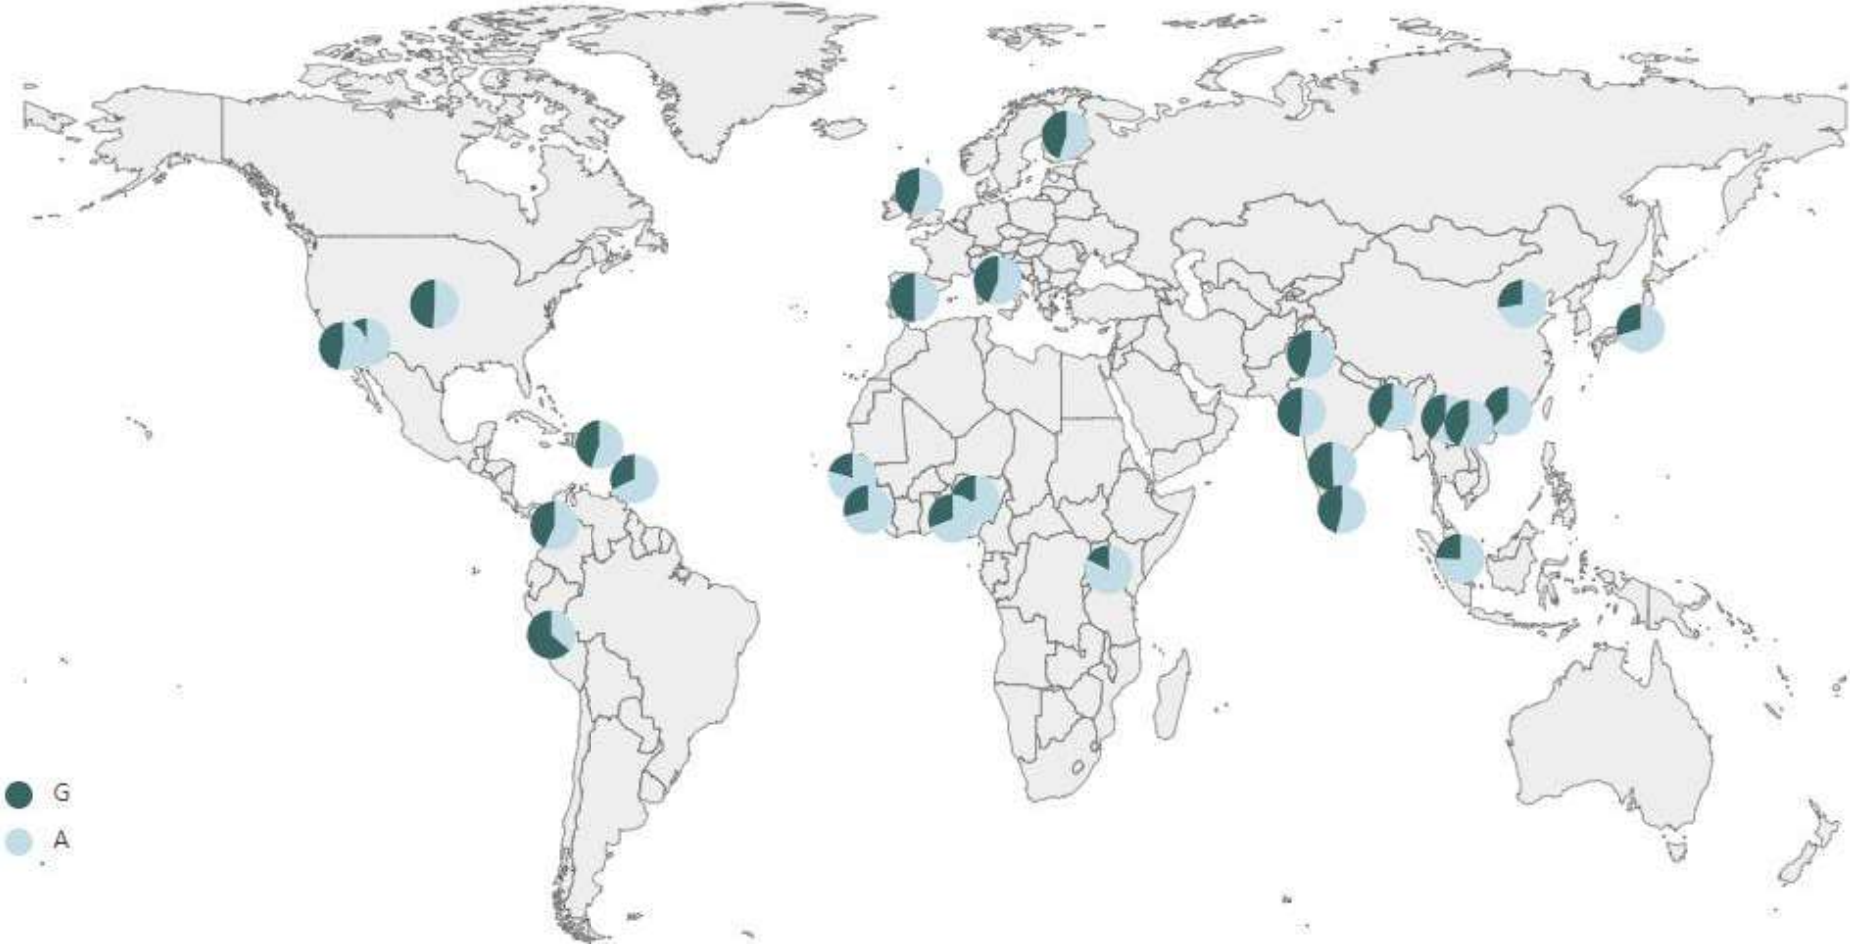



|    |              |          |          |   |   |                     |         |         |        |         |        |      |         |         |         |       |
|----|--------------|----------|----------|---|---|---------------------|---------|---------|--------|---------|--------|------|---------|---------|---------|-------|
| 29 | rs771633249  | 42837518 | 41465591 | T | C | 3_prime_UTR_variant | 0       | 0       | 0      | 0       | 0      | 0    | 0       | 0       | 0       | 0     |
| 30 | rs370421631  | 42837531 | 41465604 | A | G | 3_prime_UTR_variant | 0       | 0       | 0      | 0       | 0      | 0    | 0.01111 | 0       | 0       | 0     |
| 31 | rs77675406   | 42837534 | 41465607 | A | G | 3_prime_UTR_variant | 0.07692 | 0.07692 | 0.0833 | 0.07692 | 0.1683 | 0.06 | 0.02222 | 0.08333 | 0.06019 | 0.025 |
| 32 | rs542458473  | 42837636 | 41465709 | C | G | 3_prime_UTR_variant | 0       | 0       | 0      | 0       | 0      | 0.04 | 0       | 0       | 0       | 0     |
| 33 | rs12627374   | 42837691 | 41465764 | T | C | 3_prime_UTR_variant | 0       | 0       | 0.0625 | 0.05128 | 0.0149 | 0.12 | 0.3     | 0.05556 | 0.05556 | 0     |
| 34 | rs567103273  | 42837751 | 41465824 | G | A | 3_prime_UTR_variant | 0       | 0       | 0      | 0       | 0      | 0    | 0       | 0       | 0       | 0     |
| 35 | rs372405355  | 42837754 | 41465827 | C | T | 3_prime_UTR_variant | 0       | 0       | 0      | 0       | 0      | 0    | 0.06667 | 0       | 0       | 0     |
| 36 | rs996615575  | 42837756 | 41465829 | C | G | 3_prime_UTR_variant | 0       | 0       | 0      | 0       | 0      | 0    | 0.01111 | 0       | 0       | 0     |
| 37 | rs62217525   | 42837848 | 41465921 | T | C | 3_prime_UTR_variant | 0       | 0       | 0.0208 | 0.07692 | 0.0446 | 0    | 0       | 0       | 0.00463 | 0.2   |
| 38 | rs146564124  | 42837861 | 41465934 | T | C | 3_prime_UTR_variant | 0       | 0       | 0      | 0.01282 | 0.0198 | 0    | 0       | 0       | 0.00463 | 0     |
| 39 | rs780868244  | 42837913 | 41465986 | G | A | 3_prime_UTR_variant | 0       | 0       | 0      | 0       | 0      | 0    | 0.02222 | 0       | 0       | 0     |
| 40 | rs77996454   | 42837928 | 41466001 | A | G | 3_prime_UTR_variant | 0       | 0       | 0      | 0       | 0      | 0    | 0       | 0       | 0       | 0     |
| 41 | rs374981614  | 42838036 | 41466109 | A | G | 3_prime_UTR_variant | 0       | 0       | 0      | 0       | 0      | 0    | 0.06667 | 0       | 0       | 0     |
| 42 | rs118028230  | 42838104 | 41466177 | C | G | intron_variant      | 0       | 0       | 0      | 0.01282 | 0.005  | 0    | 0.04444 | 0.08333 | 0.03241 | 0     |
| 43 | rs369092228  | 42838114 | 41466187 | C | T | intron_variant      | 0       | 0       | 0      | 0       | 0      | 0    | 0       | 0       | 0       | 0     |
| 44 | rs73905370   | 42838138 | 41466211 | T | A | intron_variant      | 0.07692 | 0.07692 | 0.0833 | 0.07692 | 0.1683 | 0.06 | 0.02222 | 0.08333 | 0.06019 | 0.025 |
| 45 | rs55896064   | 42838198 | 41466271 | A | G | intron_variant      | 0.07692 | 0.07692 | 0.0833 | 0.07692 | 0.1683 | 0.06 | 0.02222 | 0.08333 | 0.06019 | 0.025 |
| 46 | rs57474639   | 42838268 | 41466341 | T | C | intron_variant      | 0.07692 | 0.07692 | 0.0833 | 0.07692 | 0.1683 | 0.06 | 0.02222 | 0.08333 | 0.06019 | 0.025 |
| 47 | rs79971314   | 42838269 | 41466342 | A | G | intron_variant      | 0       | 0       | 0      | 0       | 0      | 0.02 | 0.06667 | 0.02778 | 0       | 0.05  |
| 48 | rs73372161   | 42838279 | 41466352 | A | G | intron_variant      | 0       | 0       | 0      | 0       | 0      | 0.02 | 0       | 0.02778 | 0       | 0.05  |
| 49 | rs370634518  | 42838411 | 41466484 | A | C | intron_variant      | 0       | 0       | 0      | 0       | 0      | 0    | 0       | 0       | 0       | 0     |
| 50 | rs61459778   | 42838423 | 41466496 | G | C | intron_variant      | 0.07692 | 0.07692 | 0.0833 | 0.07692 | 0.1683 | 0.08 | 0.1     | 0.1111  | 0.06019 | 0.075 |
| 51 | rs145024812  | 42838456 | 41466529 | A | G | intron_variant      | 0       | 0       | 0      | 0       | 0      | 0    | 0       | 0       | 0       | 0     |
| 52 | rs377591443  | 42838514 | 41466587 | C | G | intron_variant      | 0       | 0       | 0      | 0       | 0      | 0    | 0.01111 | 0       | 0       | 0     |
| 53 | rs115975538  | 42838629 | 41466702 | A | C | intron_variant      | 0       | 0       | 0      | 0       | 0      | 0    | 0       | 0       | 0       | 0     |
| 54 | rs118133613  | 42838665 | 41466738 | A | G | intron_variant      | 0       | 0       | 0      | 0       | 0.005  | 0    | 0       | 0       | 0       | 0     |
| 55 | rs143595083  | 42838707 | 41466780 | T | C | intron_variant      | 0       | 0       | 0      | 0       | 0      | 0    | 0       | 0       | 0       | 0     |
| 56 | rs148038688  | 42838711 | 41466784 | T | C | intron_variant      | 0       | 0       | 0      | 0       | 0      | 0    | 0       | 0       | 0       | 0     |
| 57 | rs546913068  | 42838803 | 41466876 | G | C | intron_variant      | 0       | 0       | 0      | 0       | 0      | 0    | 0       | 0       | 0.00926 | 0     |
| 58 | -            | 42838860 | 41466933 | T | A | intron_variant      | 0       | 0       | 0      | 0       | 0      | 0    | 0       | 0.02778 | 0       | 0     |
| 59 | rs534326511  | 42838913 | 41466986 | T | C | intron_variant      | 0       | 0       | 0      | 0       | 0      | 0    | 0       | 0       | 0.00926 | 0     |
| 60 | rs1033026879 | 42838937 | 41467010 | A | C | intron_variant      | 0       | 0       | 0      | 0       | 0      | 0    | 0.01111 | 0       | 0       | 0     |
| 61 | rs73905371   | 42838987 | 41467060 | G | C | intron_variant      | 0.07692 | 0.07692 | 0.0833 | 0.07692 | 0.1683 | 0.06 | 0.02222 | 0.08333 | 0.06019 | 0.025 |
| 62 | rs73372163   | 42838992 | 41467065 | A | G | intron_variant      | 0.07692 | 0.07692 | 0.0833 | 0.07692 | 0.1683 | 0.08 | 0.1     | 0.1111  | 0.06019 | 0.075 |
| 63 | rs73372166   | 42839038 | 41467111 | A | G | intron_variant      | 0.07692 | 0.07692 | 0.0833 | 0.07692 | 0.1683 | 0.08 | 0.1     | 0.1111  | 0.06019 | 0.075 |

|    |              |          |          |   |   |                                          |         |         |        |         |        |      |         |         |         |       |
|----|--------------|----------|----------|---|---|------------------------------------------|---------|---------|--------|---------|--------|------|---------|---------|---------|-------|
| 64 | rs113562865  | 42839044 | 41467117 | T | C | intron_variant                           | 0       | 0       | 0      | 0       | 0      | 0.02 | 0       | 0.02778 | 0       | 0.05  |
| 65 | -            | 42839072 | 41467145 | G | T | intron_variant                           | 0.4231  | 0.4231  | 0.1458 | 0.141   | 0.0594 | 0.24 | 0.4556  | 0.4722  | 0.4028  | 0.025 |
| 66 | -            | 42839196 | 41467269 | G | A | intron_variant                           | 0       | 0       | 0      | 0       | 0      | 0    | 0.03333 | 0       | 0       | 0     |
| 67 | rs368452629  | 42839233 | 41467306 | C | T | intron_variant                           | 0       | 0       | 0      | 0       | 0      | 0    | 0       | 0       | 0       | 0     |
| 68 | rs981602772  | 42839261 | 41467334 | T | A | intron_variant                           | 0       | 0       | 0      | 0       | 0.005  | 0    | 0       | 0       | 0       | 0     |
| 69 | rs371583992  | 42839278 | 41467351 | G | T | intron_variant                           | 0       | 0       | 0      | 0       | 0      | 0    | 0       | 0       | 0       | 0     |
| 70 | -            | 42839299 | 41467372 | C | G | intron_variant                           | 0.4231  | 0.4231  | 0.0833 | 0.07692 | 0.0396 | 0.12 | 0.2     | 0.3333  | 0.3102  | 0.025 |
| 71 | -            | 42839361 | 41467434 | G | A | intron_variant                           | 0       | 0       | 0      | 0       | 0      | 0    | 0       | 0       | 0       | 0     |
| 72 | rs73372168   | 42839362 | 41467435 | A | G | intron_variant                           | 0       | 0       | 0      | 0       | 0      | 0    | 0       | 0       | 0       | 0     |
| 73 | rs910388295  | 42839444 | 41467517 | G | C | intron_variant                           | 0       | 0       | 0.0208 | 0       | 0.0099 | 0    | 0       | 0       | 0.00463 | 0     |
| 74 | rs192955773  | 42839545 | 41467618 | C | T | intron_variant                           | 0       | 0       | 0      | 0       | 0      | 0    | 0       | 0       | 0       | 0     |
| 75 | rs961773771  | 42839588 | 41467661 | G | C | intron_variant                           | 0       | 0       | 0      | 0       | 0      | 0    | 0       | 0       | 0       | 0     |
| 76 | rs1429823013 | 42839617 | 41467690 | G | C | intron_variant                           | 0       | 0       | 0.0208 | 0       | 0      | 0    | 0       | 0       | 0       | 0     |
| 77 | rs183984610  | 42839626 | 41467699 | A | G | intron_variant                           | 0       | 0       | 0      | 0       | 0      | 0    | 0       | 0       | 0       | 0     |
| 78 | rs142750000  | 42839661 | 41467734 | T | C | splice_region_variant,synonymous_variant | 0       | 0       | 0      | 0       | 0.005  | 0    | 0       | 0       | 0       | 0     |
| 79 | rs374377315  | 42839784 | 41467857 | T | C | synonymous_variant                       | 0       | 0       | 0      | 0       | 0.005  | 0    | 0       | 0       | 0       | 0     |
| 80 | rs147359020  | 42839865 | 41467938 | A | G | intron_variant                           | 0       | 0       | 0      | 0       | 0      | 0.04 | 0.01111 | 0       | 0.00463 | 0     |
| 81 | rs1016428148 | 42839900 | 41467973 | G | C | intron_variant                           | 0       | 0       | 0      | 0       | 0      | 0    | 0       | 0       | 0       | 0     |
| 82 | rs139015396  | 42839982 | 41468055 | T | C | intron_variant                           | 0       | 0       | 0      | 0       | 0      | 0    | 0       | 0       | 0       | 0     |
| 83 | rs149855493  | 42839993 | 41468066 | C | T | intron_variant                           | 0       | 0       | 0      | 0       | 0      | 0    | 0       | 0       | 0       | 0     |
| 84 | rs1014364281 | 42839999 | 41468072 | G | C | intron_variant                           | 0       | 0       | 0      | 0       | 0      | 0    | 0       | 0       | 0       | 0     |
| 85 | rs144823388  | 42840029 | 41468102 | T | A | intron_variant                           | 0       | 0       | 0      | 0       | 0      | 0    | 0       | 0       | 0       | 0     |
| 86 | rs191394761  | 42840048 | 41468121 | T | C | intron_variant                           | 0       | 0       | 0      | 0       | 0      | 0    | 0       | 0       | 0       | 0.05  |
| 87 | rs76315847   | 42840130 | 41468203 | A | G | intron_variant                           | 0       | 0       | 0      | 0       | 0      | 0    | 0       | 0       | 0       | 0     |
| 88 | rs146605032  | 42840168 | 41468241 | A | G | intron_variant                           | 0       | 0       | 0      | 0       | 0      | 0    | 0       | 0       | 0       | 0     |
| 89 | rs1017698498 | 42840171 | 41468244 | T | C | intron_variant                           | 0       | 0       | 0      | 0.01282 | 0      | 0    | 0       | 0       | 0       | 0     |
| 90 | rs743542     | 42840172 | 41468245 | A | G | intron_variant                           | 0.2692  | 0.2692  | 0.2083 | 0.1154  | 0.1287 | 0.18 | 0.3889  | 0.25    | 0.213   | 0     |
| 91 | rs190618812  | 42840187 | 41468260 | A | G | intron_variant                           | 0       | 0       | 0      | 0       | 0      | 0    | 0       | 0.02778 | 0.00463 | 0     |
| 92 | -            | 42840267 | 41468340 | A | G | intron_variant                           | 0       | 0       | 0      | 0       | 0      | 0    | 0       | 0       | 0.00463 | 0     |
| 93 | rs572963642  | 42840292 | 41468365 | C | G | intron_variant                           | 0       | 0       | 0      | 0       | 0      | 0    | 0       | 0       | 0.00926 | 0     |
| 94 | rs148125094  | 42840394 | 41468467 | T | C | missense_variant                         | 0       | 0       | 0      | 0       | 0      | 0    | 0       | 0       | 0       | 0     |
| 95 | rs375874663  | 42840504 | 41468577 | C | T | intron_variant                           | 0       | 0       | 0      | 0       | 0      | 0    | 0       | 0       | 0       | 0     |
| 96 | rs73372170   | 42840568 | 41468641 | G | C | intron_variant                           | 0       | 0       | 0      | 0       | 0      | 0.02 | 0.06667 | 0.02778 | 0       | 0.05  |
| 97 | COSV59827297 | 42840580 | 41468653 | T | C | intron_variant                           | 0.07692 | 0.07692 | 0.3542 | 0.2308  | 0.3218 | 0.34 | 0.3444  | 0.25    | 0.3843  | 0.025 |
| 98 | -            | 42840595 | 41468668 | G | C | intron_variant                           | 0.07692 | 0.07692 | 0.3542 | 0.2308  | 0.3218 | 0.34 | 0.3444  | 0.25    | 0.3843  | 0.025 |

|     |              |          |          |   |   |                |        |        |        |         |        |      |         |         |         |       |
|-----|--------------|----------|----------|---|---|----------------|--------|--------|--------|---------|--------|------|---------|---------|---------|-------|
| 99  | rs143672898  | 42840655 | 41468728 | T | C | intron_variant | 0      | 0      | 0      | 0       | 0      | 0.02 | 0       | 0       | 0       | 0     |
| 100 | rs748580091  | 42840740 | 41468813 | T | A | intron_variant | 0      | 0      | 0      | 0       | 0      | 0    | 0.01111 | 0       | 0       | 0     |
| 101 | rs146797606  | 42840758 | 41468831 | C | T | intron_variant | 0      | 0      | 0      | 0       | 0      | 0    | 0       | 0       | 0       | 0     |
| 102 | rs573343651  | 42840760 | 41468833 | C | A | intron_variant | 0      | 0      | 0      | 0       | 0      | 0.02 | 0       | 0.02778 | 0       | 0     |
| 103 | rs1443771075 | 42840813 | 41468886 | T | C | intron_variant | 0      | 0      | 0      | 0.01282 | 0      | 0    | 0       | 0       | 0       | 0     |
| 104 | rs7283324    | 42840829 | 41468902 | T | C | intron_variant | 0.3462 | 0.3462 | 0.3125 | 0.2179  | 0.3267 | 0.24 | 0.4667  | 0.4167  | 0.3056  | 0.075 |
| 105 | -            | 42840872 | 41468945 | T | C | intron_variant | 0.4231 | 0.4231 | 0.0625 | 0.02564 | 0.0297 | 0.12 | 0.1667  | 0.3333  | 0.3102  | 0     |
| 106 | rs150382508  | 42841054 | 41469127 | C | A | intron_variant | 0      | 0      | 0      | 0       | 0      | 0    | 0       | 0       | 0       | 0     |
| 107 | rs115774576  | 42841073 | 41469146 | A | T | intron_variant | 0      | 0      | 0      | 0       | 0      | 0    | 0       | 0       | 0       | 0     |
| 108 | rs114549926  | 42841128 | 41469201 | A | G | intron_variant | 0      | 0      | 0      | 0       | 0      | 0    | 0       | 0       | 0       | 0     |
| 109 | rs376403654  | 42841168 | 41469241 | A | G | intron_variant | 0      | 0      | 0      | 0       | 0      | 0    | 0       | 0       | 0       | 0     |
| 110 | rs7279603    | 42841224 | 41469297 | C | T | intron_variant | 0      | 0      | 0.3333 | 0.3077  | 0.2475 | 0.22 | 0.2889  | 0.2222  | 0.1991  | 0.375 |
| 111 | rs971603670  | 42841234 | 41469307 | C | G | intron_variant | 0      | 0      | 0      | 0       | 0      | 0    | 0.03333 | 0       | 0       | 0     |
| 112 | rs7278739    | 42841238 | 41469311 | A | G | intron_variant | 0      | 0      | 0      | 0       | 0      | 0.02 | 0.07778 | 0.02778 | 0       | 0.05  |
| 113 | rs7278627    | 42841333 | 41469406 | A | C | intron_variant | 0      | 0      | 0      | 0       | 0      | 0.02 | 0       | 0.02778 | 0       | 0.05  |
| 114 | rs149109132  | 42841334 | 41469407 | A | G | intron_variant | 0      | 0      | 0      | 0       | 0      | 0    | 0       | 0       | 0       | 0     |
| 115 | rs374608719  | 42841359 | 41469432 | T | C | intron_variant | 0      | 0      | 0      | 0       | 0      | 0    | 0       | 0       | 0       | 0     |
| 116 | rs185416185  | 42841370 | 41469443 | T | C | intron_variant | 0      | 0      | 0      | 0.01282 | 0.0099 | 0    | 0       | 0       | 0       | 0     |
| 117 | rs146052428  | 42841445 | 41469518 | T | C | intron_variant | 0      | 0      | 0      | 0       | 0      | 0    | 0       | 0       | 0       | 0     |
| 118 | rs370663590  | 42841554 | 41469627 | G | C | intron_variant | 0      | 0      | 0      | 0       | 0      | 0    | 0       | 0       | 0       | 0     |
| 119 | rs2070793    | 42841577 | 41469650 | G | A | intron_variant | 0      | 0      | 0.3333 | 0.3077  | 0.2475 | 0.22 | 0.2889  | 0.2222  | 0.1991  | 0.375 |
| 120 | rs117898838  | 42841583 | 41469656 | A | G | intron_variant | 0      | 0      | 0.0208 | 0       | 0      | 0    | 0       | 0       | 0.00463 | 0     |
| 121 | rs2070792    | 42841610 | 41469683 | A | G | intron_variant | 0      | 0      | 0.3333 | 0.3077  | 0.2475 | 0.22 | 0.2889  | 0.2222  | 0.1991  | 0.375 |
| 122 | -            | 42841629 | 41469702 | C | A | intron_variant | 0      | 0      | 0      | 0       | 0.005  | 0    | 0       | 0       | 0       | 0     |
| 123 | rs2070791    | 42841675 | 41469748 | G | C | intron_variant | 0      | 0      | 0      | 0.01282 | 0.005  | 0    | 0.04444 | 0.08333 | 0.03241 | 0     |
| 124 | rs2070790    | 42841687 | 41469760 | C | G | intron_variant | 0      | 0      | 0.3333 | 0.3077  | 0.2475 | 0.2  | 0.2889  | 0.1944  | 0.1991  | 0.325 |
| 125 | rs373678323  | 42841694 | 41469767 | A | G | intron_variant | 0      | 0      | 0      | 0       | 0      | 0    | 0       | 0       | 0       | 0     |
| 126 | rs142769034  | 42841740 | 41469813 | T | C | intron_variant | 0      | 0      | 0      | 0.01282 | 0.0099 | 0    | 0       | 0       | 0       | 0     |
| 127 | rs111572592  | 42841790 | 41469863 | A | G | intron_variant | 0      | 0      | 0      | 0.05128 | 0.005  | 0    | 0       | 0       | 0       | 0     |
| 128 | rs2070789    | 42841804 | 41469877 | T | C | intron_variant | 0.3462 | 0.3462 | 0.3125 | 0.2179  | 0.3267 | 0.24 | 0.4667  | 0.4167  | 0.3056  | 0.075 |
| 129 | rs1461069953 | 42841830 | 41469903 | C | T | intron_variant | 0      | 0      | 0      | 0       | 0.005  | 0    | 0       | 0       | 0       | 0     |
| 130 | rs141603473  | 42841910 | 41469983 | A | C | intron_variant | 0      | 0      | 0      | 0       | 0      | 0    | 0       | 0       | 0       | 0     |
| 131 | rs542946711  | 42841922 | 41469995 | G | A | intron_variant | 0      | 0      | 0      | 0       | 0.0099 | 0    | 0       | 0.02778 | 0       | 0     |
| 132 | rs113564116  | 42841938 | 41470011 | C | T | intron_variant | 0      | 0      | 0.0208 | 0.01282 | 0.0297 | 0    | 0       | 0       | 0       | 0     |
| 133 | rs2070788    | 42841988 | 41470061 | G | A | intron_variant | 0.3462 | 0.3462 | 0.3542 | 0.4744  | 0.4257 | 0.44 | 0.3222  | 0.3889  | 0.4954  | 0.4   |

|     |              |          |          |   |   |                    |        |        |        |         |        |      |         |         |         |       |
|-----|--------------|----------|----------|---|---|--------------------|--------|--------|--------|---------|--------|------|---------|---------|---------|-------|
| 134 | rs139432971  | 42842046 | 41470119 | G | C | intron_variant     | 0      | 0      | 0      | 0       | 0      | 0    | 0       | 0       | 0       | 0     |
| 135 | rs189832305  | 42842079 | 41470152 | T | C | intron_variant     | 0      | 0      | 0      | 0       | 0      | 0    | 0       | 0       | 0       | 0     |
| 136 | -            | 42842123 | 41470196 | A | C | intron_variant     | 0.3462 | 0.3462 | 0.3542 | 0.4744  | 0.4257 | 0.44 | 0.2444  | 0.3889  | 0.4954  | 0.4   |
| 137 | rs2070787    | 42842129 | 41470202 | G | T | intron_variant     | 0      | 0      | 0.3333 | 0.3077  | 0.2475 | 0.2  | 0.2778  | 0.1944  | 0.1991  | 0.325 |
| 138 | rs376499029  | 42842152 | 41470225 | C | T | intron_variant     | 0      | 0      | 0      | 0       | 0      | 0    | 0       | 0       | 0       | 0     |
| 139 | rs2070786    | 42842203 | 41470276 | C | T | intron_variant     | 0      | 0      | 0.3333 | 0.3077  | 0.2475 | 0.2  | 0.2889  | 0.1944  | 0.1991  | 0.325 |
| 140 | rs758426874  | 42842208 | 41470281 | A | G | intron_variant     | 0      | 0      | 0      | 0       | 0      | 0    | 0       | 0       | 0.00926 | 0     |
| 141 | -            | 42842417 | 41470490 | G | A | intron_variant     | 0      | 0      | 0      | 0       | 0      | 0    | 0       | 0       | 0.00463 | 0     |
| 142 | rs547168890  | 42842451 | 41470524 | A | G | intron_variant     | 0      | 0      | 0      | 0       | 0      | 0    | 0       | 0       | 0       | 0     |
| 143 | rs373469999  | 42842492 | 41470565 | C | G | intron_variant     | 0      | 0      | 0      | 0       | 0      | 0    | 0       | 0       | 0       | 0     |
| 144 | rs1406734513 | 42842516 | 41470589 | A | C | intron_variant     | 0      | 0      | 0      | 0       | 0      | 0    | 0       | 0       | 0.00463 | 0     |
| 145 | rs78503214   | 42842543 | 41470616 | T | C | intron_variant     | 0      | 0      | 0      | 0       | 0      | 0    | 0       | 0       | 0       | 0     |
| 146 | -            | 42842546 | 41470619 | T | C | intron_variant     | 0      | 0      | 0      | 0       | 0.005  | 0    | 0       | 0       | 0       | 0     |
| 147 | rs749103473  | 42842549 | 41470622 | A | T | intron_variant     | 0      | 0      | 0      | 0       | 0      | 0    | 0       | 0       | 0       | 0.025 |
| 148 | rs61735794   | 42842591 | 41470664 | T | C | synonymous_variant | 0      | 0      | 0.0208 | 0.01282 | 0.0248 | 0.02 | 0.01111 | 0       | 0       | 0.05  |
| 149 | -            | 42842621 | 41470694 | C | T | synonymous_variant | 0      | 0      | 0      | 0       | 0      | 0    | 0       | 0       | 0.00463 | 0     |
| 150 | rs61735795   | 42842623 | 41470696 | A | G | missense_variant   | 0      | 0      | 0      | 0       | 0      | 0    | 0       | 0       | 0       | 0     |
| 151 | rs143712818  | 42842705 | 41470778 | T | G | intron_variant     | 0      | 0      | 0      | 0       | 0      | 0    | 0       | 0       | 0       | 0     |
| 152 | rs573482152  | 42842740 | 41470813 | A | T | intron_variant     | 0      | 0      | 0      | 0       | 0.005  | 0    | 0       | 0       | 0       | 0     |
| 153 | rs1160357228 | 42842746 | 41470819 | T | C | intron_variant     | 0      | 0      | 0      | 0       | 0      | 0    | 0       | 0       | 0.00463 | 0     |
| 154 | -            | 42842759 | 41470832 | A | C | intron_variant     | 0      | 0      | 0      | 0       | 0.005  | 0    | 0       | 0       | 0       | 0     |
| 155 | rs28524972   | 42842771 | 41470844 | G | C | intron_variant     | 0      | 0      | 0.3333 | 0.2949  | 0.2376 | 0.2  | 0.2778  | 0.1944  | 0.1991  | 0.325 |
| 156 | -            | 42842823 | 41470896 | A | C | intron_variant     | 0      | 0      | 0      | 0       | 0      | 0    | 0       | 0       | 0       | 0     |
| 157 | -            | 42842834 | 41470907 | T | C | intron_variant     | 0.4231 | 0.4231 | 0.0625 | 0.02564 | 0.0297 | 0.12 | 0.2     | 0.3333  | 0.3102  | 0     |
| 158 | rs544946928  | 42842841 | 41470914 | T | C | intron_variant     | 0      | 0      | 0      | 0       | 0      | 0.02 | 0       | 0       | 0       | 0.025 |
| 159 | -            | 42842854 | 41470927 | C | A | intron_variant     | 0.4231 | 0.4231 | 0.0625 | 0.02564 | 0.0297 | 0.14 | 0.2     | 0.3611  | 0.3102  | 0.05  |
| 160 | -            | 42842949 | 41471022 | T | C | intron_variant     | 0.4231 | 0.4231 | 0.0625 | 0.02564 | 0.0297 | 0.12 | 0.2     | 0.3333  | 0.3102  | 0     |
| 161 | rs1000072663 | 42842984 | 41471057 | G | A | intron_variant     | 0      | 0      | 0      | 0       | 0      | 0    | 0       | 0.02778 | 0.00463 | 0     |
| 162 | rs9305744    | 42842988 | 41471061 | A | G | intron_variant     | 0.3462 | 0.3462 | 0.3125 | 0.2308  | 0.3366 | 0.24 | 0.4667  | 0.4167  | 0.3056  | 0.075 |
| 163 | rs35050484   | 42843006 | 41471079 | A | G | intron_variant     | 0      | 0      | 0.0625 | 0.0641  | 0.0297 | 0    | 0       | 0       | 0.00463 | 0.05  |
| 164 | rs372665499  | 42843031 | 41471104 | T | C | intron_variant     | 0      | 0      | 0      | 0       | 0      | 0    | 0       | 0       | 0       | 0     |
| 165 | rs1198022001 | 42843074 | 41471147 | G | C | intron_variant     | 0      | 0      | 0      | 0       | 0      | 0    | 0       | 0       | 0.00463 | 0     |
| 166 | rs375719922  | 42843078 | 41471151 | C | T | intron_variant     | 0      | 0      | 0      | 0       | 0      | 0    | 0.02222 | 0       | 0       | 0     |
| 167 | rs142834250  | 42843107 | 41471180 | G | T | intron_variant     | 0      | 0      | 0      | 0       | 0      | 0    | 0       | 0       | 0       | 0     |
| 168 | rs370896169  | 42843236 | 41471309 | C | T | intron_variant     | 0      | 0      | 0      | 0       | 0      | 0    | 0       | 0.02778 | 0       | 0     |



|     |              |          |          |   |   |                  |         |         |        |         |        |      |         |         |         |       |
|-----|--------------|----------|----------|---|---|------------------|---------|---------|--------|---------|--------|------|---------|---------|---------|-------|
| 169 | rs952726028  | 42843281 | 41471354 | C | T | intron_variant   | 0       | 0       | 0      | 0       | 0      | 0    | 0       | 0       | 0.00463 | 0     |
| 170 | rs1016288269 | 42843352 | 41471425 | A | G | intron_variant   | 0       | 0       | 0      | 0       | 0      | 0    | 0       | 0       | 0       | 0     |
| 171 | rs377410798  | 42843419 | 41471492 | C | G | intron_variant   | 0       | 0       | 0      | 0       | 0      | 0    | 0       | 0       | 0       | 0     |
| 172 | rs187052796  | 42843532 | 41471605 | T | C | intron_variant   | 0       | 0       | 0      | 0       | 0      | 0    | 0       | 0       | 0       | 0     |
| 173 | rs467375     | 42843565 | 41471638 | A | G | intron_variant   | 0.07692 | 0.07692 | 0.2917 | 0.4487  | 0.396  | 0.42 | 0.05556 | 0.02778 | 0.1806  | 0.45  |
| 174 | -            | 42843597 | 41471670 | T | C | intron_variant   | 0       | 0       | 0      | 0.01282 | 0      | 0    | 0       | 0       | 0       | 0     |
| 175 | rs1015613248 | 42843624 | 41471697 | T | C | intron_variant   | 0       | 0       | 0      | 0       | 0      | 0    | 0.01111 | 0       | 0       | 0     |
| 176 | rs116511699  | 42843655 | 41471728 | T | C | intron_variant   | 0       | 0       | 0      | 0       | 0      | 0    | 0       | 0       | 0       | 0     |
| 177 | rs370478006  | 42843703 | 41471776 | T | A | intron_variant   | 0       | 0       | 0      | 0       | 0      | 0    | 0       | 0       | 0       | 0     |
| 178 | COSV59828007 | 42843855 | 41471928 | C | G | missense_variant | 0.03846 | 0.03846 | 0      | 0       | 0      | 0    | 0       | 0       | 0       | 0     |
| 179 | rs201320664  | 42843935 | 41472008 | C | T | intron_variant   | 0       | 0       | 0      | 0       | 0      | 0    | 0       | 0       | 0       | 0     |
| 180 | rs187078345  | 42843940 | 41472013 | A | G | intron_variant   | 0       | 0       | 0      | 0       | 0      | 0    | 0.01111 | 0       | 0       | 0     |
| 181 | COSV59823391 | 42843960 | 41472033 | A | G | intron_variant   | 0.4231  | 0.4231  | 0.0625 | 0.02564 | 0.0297 | 0.12 | 0.2     | 0.3333  | 0.2917  | 0     |
| 182 | rs937260183  | 42844014 | 41472087 | A | G | intron_variant   | 0       | 0       | 0      | 0       | 0      | 0    | 0       | 0       | 0       | 0     |
| 183 | COSV59821944 | 42844052 | 41472125 | T | G | intron_variant   | 0.4231  | 0.4231  | 0.0625 | 0.02564 | 0.0297 | 0.12 | 0.2     | 0.3333  | 0.287   | 0     |
| 184 | COSV59824040 | 42844057 | 41472130 | G | A | intron_variant   | 0.3462  | 0.3462  | 0.3542 | 0.4744  | 0.4257 | 0.46 | 0.2556  | 0.3611  | 0.4954  | 0.45  |
| 185 | rs7364088    | 42844130 | 41472203 | A | G | intron_variant   | 0.3462  | 0.3462  | 0.3333 | 0.2564  | 0.3465 | 0.24 | 0.4667  | 0.4167  | 0.3102  | 0.075 |
| 186 | rs182254633  | 42844168 | 41472241 | G | A | intron_variant   | 0       | 0       | 0      | 0       | 0      | 0    | 0       | 0       | 0       | 0     |
| 187 | rs146957681  | 42844174 | 41472247 | T | C | intron_variant   | 0       | 0       | 0      | 0       | 0      | 0    | 0       | 0       | 0.00926 | 0     |
| 188 | rs76135088   | 42844202 | 41472275 | G | A | intron_variant   | 0       | 0       | 0      | 0       | 0      | 0    | 0       | 0       | 0       | 0     |
| 189 | rs28548447   | 42844238 | 41472311 | A | G | intron_variant   | 0       | 0       | 0.3333 | 0.2949  | 0.2475 | 0.22 | 0.2111  | 0.1944  | 0.1991  | 0.325 |
| 190 | rs375524422  | 42844257 | 41472330 | T | C | intron_variant   | 0       | 0       | 0      | 0       | 0      | 0    | 0       | 0       | 0       | 0     |
| 191 | rs114844880  | 42844262 | 41472335 | C | T | intron_variant   | 0       | 0       | 0      | 0       | 0      | 0    | 0       | 0       | 0       | 0     |
| 192 | rs79065748   | 42844498 | 41472571 | A | C | intron_variant   | 0       | 0       | 0      | 0       | 0      | 0    | 0       | 0       | 0       | 0     |
| 193 | rs986882653  | 42844642 | 41472715 | G | C | intron_variant   | 0       | 0       | 0      | 0       | 0      | 0    | 0.01111 | 0       | 0       | 0     |
| 194 | rs116606027  | 42844713 | 41472786 | A | G | intron_variant   | 0       | 0       | 0      | 0       | 0      | 0    | 0.01111 | 0       | 0       | 0     |
| 195 | rs368644630  | 42844733 | 41472806 | C | T | intron_variant   | 0       | 0       | 0      | 0       | 0      | 0    | 0       | 0       | 0       | 0     |
| 196 | rs112980967  | 42844765 | 41472838 | A | G | intron_variant   | 0       | 0       | 0      | 0       | 0      | 0    | 0       | 0       | 0       | 0     |
| 197 | rs184164037  | 42844780 | 41472853 | C | T | intron_variant   | 0       | 0       | 0      | 0       | 0      | 0    | 0.01111 | 0       | 0       | 0     |
| 198 | -            | 42844870 | 41472943 | A | G | intron_variant   | 0       | 0       | 0      | 0       | 0      | 0    | 0.01111 | 0       | 0       | 0     |
| 199 | rs73372182   | 42844917 | 41472990 | A | C | intron_variant   | 0       | 0       | 0      | 0       | 0      | 0.02 | 0       | 0.02778 | 0       | 0.05  |
| 200 | rs143097165  | 42844925 | 41472998 | A | G | intron_variant   | 0       | 0       | 0      | 0       | 0      | 0    | 0.01111 | 0       | 0       | 0     |
| 201 | rs766846682  | 42844994 | 41473067 | T | C | intron_variant   | 0       | 0       | 0      | 0       | 0      | 0    | 0       | 0.02778 | 0       | 0     |
| 202 | rs117827300  | 42845065 | 41473138 | A | G | intron_variant   | 0       | 0       | 0      | 0       | 0.0198 | 0    | 0       | 0       | 0.06019 | 0     |
| 203 | rs188514624  | 42845101 | 41473174 | C | G | intron_variant   | 0       | 0       | 0      | 0       | 0      | 0    | 0.01111 | 0       | 0       | 0     |

|     |              |          |          |   |   |                    |         |         |        |         |        |      |         |         |         |       |
|-----|--------------|----------|----------|---|---|--------------------|---------|---------|--------|---------|--------|------|---------|---------|---------|-------|
| 204 | rs374689537  | 42845160 | 41473233 | T | C | intron_variant     | 0       | 0       | 0      | 0       | 0      | 0    | 0.06667 | 0       | 0       | 0     |
| 205 | rs73230068   | 42845167 | 41473240 | C | G | intron_variant     | 0       | 0       | 0.0208 | 0.05128 | 0.0248 | 0.02 | 0       | 0       | 0       | 0.05  |
| 206 | rs990674063  | 42845180 | 41473253 | T | C | intron_variant     | 0       | 0       | 0      | 0       | 0      | 0    | 0.01111 | 0       | 0       | 0     |
| 207 | rs75168613   | 42845207 | 41473280 | A | G | intron_variant     | 0       | 0       | 0      | 0       | 0      | 0    | 0.01111 | 0       | 0       | 0.05  |
| 208 | rs113288437  | 42845216 | 41473289 | G | T | intron_variant     | 0       | 0       | 0      | 0       | 0      | 0    | 0.01111 | 0       | 0       | 0.05  |
| 209 | rs140141551  | 42845220 | 41473293 | A | C | intron_variant     | 0       | 0       | 0      | 0.02564 | 0.0248 | 0    | 0       | 0       | 0       | 0.025 |
| 210 | rs774049600  | 42845257 | 41473330 | T | C | synonymous_variant | 0       | 0       | 0      | 0       | 0      | 0    | 0       | 0       | 0       | 0     |
| 211 | rs143291395  | 42845260 | 41473333 | A | G | synonymous_variant | 0       | 0       | 0      | 0       | 0      | 0    | 0       | 0       | 0       | 0     |
| 212 | rs113436669  | 42845278 | 41473351 | A | G | synonymous_variant | 0       | 0       | 0      | 0       | 0      | 0    | 0       | 0       | 0       | 0     |
| 213 | rs2298658    | 42845359 | 41473432 | T | C | synonymous_variant | 0       | 0       | 0      | 0       | 0      | 0    | 0       | 0       | 0.02315 | 0     |
| 214 | rs2298659    | 42845374 | 41473447 | A | G | synonymous_variant | 0.3462  | 0.3462  | 0.25   | 0.1795  | 0.3168 | 0.16 | 0.1667  | 0.3333  | 0.2454  | 0.075 |
| 215 | rs17854725   | 42845383 | 41473456 | G | A | synonymous_variant | 0.3462  | 0.3462  | 0.4375 | 0.4744  | 0.4703 | 0.48 | 0.1444  | 0.2222  | 0.3426  | 0.35  |
| 216 | rs756848444  | 42845471 | 41473544 | A | G | intron_variant     | 0       | 0       | 0      | 0       | 0.005  | 0    | 0       | 0       | 0       | 0     |
| 217 | rs377496737  | 42845489 | 41473562 | T | C | intron_variant     | 0       | 0       | 0      | 0       | 0.005  | 0    | 0       | 0       | 0       | 0     |
| 218 | rs113928389  | 42845559 | 41473632 | A | G | intron_variant     | 0       | 0       | 0      | 0       | 0      | 0    | 0.01111 | 0       | 0       | 0     |
| 219 | rs2298660    | 42845633 | 41473706 | T | C | intron_variant     | 0.3462  | 0.3462  | 0.2083 | 0.1538  | 0.2822 | 0.16 | 0.1667  | 0.3611  | 0.2454  | 0.075 |
| 220 | rs55964536   | 42845638 | 41473711 | T | C | intron_variant     | 0.07692 | 0.07692 | 0.2708 | 0.4615  | 0.4158 | 0.42 | 0.04444 | 0.02778 | 0.1852  | 0.4   |
| 221 | rs2298661    | 42845642 | 41473715 | A | C | intron_variant     | 0.3462  | 0.3462  | 0.3125 | 0.2436  | 0.3119 | 0.22 | 0.4667  | 0.4167  | 0.3102  | 0.025 |
| 222 | rs1039732893 | 42845655 | 41473728 | A | G | intron_variant     | 0       | 0       | 0      | 0       | 0      | 0    | 0.01111 | 0       | 0       | 0     |
| 223 | -            | 42845658 | 41473731 | C | G | intron_variant     | 0       | 0       | 0      | 0       | 0      | 0    | 0       | 0       | 0       | 0     |
| 224 | rs950562638  | 42845665 | 41473738 | A | G | intron_variant     | 0       | 0       | 0      | 0       | 0      | 0    | 0       | 0       | 0.00463 | 0     |
| 225 | rs559830930  | 42845692 | 41473765 | G | A | intron_variant     | 0.03846 | 0.03846 | 0      | 0       | 0      | 0    | 0       | 0       | 0       | 0     |
| 226 | rs374850529  | 42845705 | 41473778 | A | G | intron_variant     | 0       | 0       | 0      | 0       | 0      | 0    | 0       | 0       | 0       | 0     |
| 227 | rs77511690   | 42845740 | 41473813 | A | G | intron_variant     | 0       | 0       | 0      | 0       | 0      | 0    | 0       | 0       | 0       | 0     |
| 228 | rs368994585  | 42845816 | 41473889 | A | G | intron_variant     | 0       | 0       | 0      | 0       | 0      | 0    | 0.07778 | 0       | 0       | 0     |
| 229 | rs371053759  | 42845834 | 41473907 | T | G | intron_variant     | 0       | 0       | 0      | 0       | 0      | 0    | 0       | 0       | 0       | 0     |
| 230 | -            | 42845880 | 41473953 | T | G | intron_variant     | 0       | 0       | 0      | 0       | 0      | 0    | 0       | 0.02778 | 0       | 0     |
| 231 | rs3787946    | 42847735 | 41475808 | C | G | intron_variant     | 0.3462  | 0.3462  | 0.3125 | 0.2436  | 0.3119 | 0.18 | 0.4778  | 0.4167  | 0.3102  | 0.025 |
| 232 | rs374510753  | 42847763 | 41475836 | T | C | intron_variant     | 0       | 0       | 0      | 0       | 0      | 0    | 0.02222 | 0       | 0       | 0     |
| 233 | rs180784757  | 42847764 | 41475837 | A | G | intron_variant     | 0       | 0       | 0      | 0       | 0      | 0    | 0       | 0       | 0       | 0     |
| 234 | rs375615614  | 42847773 | 41475846 | A | G | intron_variant     | 0       | 0       | 0      | 0       | 0      | 0    | 0       | 0       | 0       | 0     |
| 235 | rs371965055  | 42847798 | 41475871 | T | C | intron_variant     | 0       | 0       | 0      | 0       | 0      | 0.02 | 0       | 0       | 0       | 0     |
| 236 | rs117888036  | 42847846 | 41475919 | A | G | intron_variant     | 0       | 0       | 0      | 0       | 0      | 0    | 0       | 0       | 0       | 0     |
| 237 | rs368735421  | 42847909 | 41475982 | T | C | intron_variant     | 0       | 0       | 0      | 0       | 0      | 0    | 0       | 0       | 0       | 0     |
| 238 | rs66575656   | 42847935 | 41476008 | T | C | intron_variant     | 0       | 0       | 0.3542 | 0.2692  | 0.2426 | 0.22 | 0.2222  | 0.1944  | 0.1944  | 0.275 |

|     |              |          |          |   |   |                |         |         |        |         |        |      |         |        |         |       |
|-----|--------------|----------|----------|---|---|----------------|---------|---------|--------|---------|--------|------|---------|--------|---------|-------|
| 239 | rs1310846114 | 42848016 | 41476089 | T | C | intron_variant | 0       | 0       | 0      | 0       | 0      | 0    | 0       | 0      | 0.00926 | 0     |
| 240 | rs189425119  | 42848017 | 41476090 | A | G | intron_variant | 0       | 0       | 0      | 0       | 0      | 0    | 0       | 0      | 0       | 0     |
| 241 | -            | 42848038 | 41476111 | C | A | intron_variant | 0       | 0       | 0      | 0.01282 | 0      | 0    | 0       | 0      | 0       | 0     |
| 242 | rs80027429   | 42848096 | 41476169 | A | G | intron_variant | 0       | 0       | 0      | 0.03846 | 0.0099 | 0    | 0       | 0      | 0       | 0     |
| 243 | -            | 42848115 | 41476188 | G | C | intron_variant | 0.4231  | 0.4231  | 0.0625 | 0.02564 | 0.0297 | 0.12 | 0.1778  | 0.3333 | 0.3102  | 0     |
| 244 | rs367879274  | 42848178 | 41476251 | T | C | intron_variant | 0       | 0       | 0      | 0       | 0      | 0    | 0       | 0      | 0       | 0     |
| 245 | rs8129582    | 42848183 | 41476256 | A | G | intron_variant | 0       | 0       | 0      | 0       | 0      | 0    | 0       | 0      | 0       | 0     |
| 246 | -            | 42848187 | 41476260 | C | T | intron_variant | 0.07692 | 0.07692 | 0.375  | 0.2692  | 0.3416 | 0.36 | 0.2778  | 0.2222 | 0.3796  | 0.075 |
| 247 | rs62217527   | 42848219 | 41476292 | T | C | intron_variant | 0       | 0       | 0.0208 | 0.1026  | 0.0842 | 0.02 | 0       | 0      | 0.00926 | 0.175 |
| 248 | rs112213575  | 42848274 | 41476347 | A | G | intron_variant | 0       | 0       | 0      | 0       | 0      | 0    | 0       | 0      | 0       | 0     |
| 249 | rs527284833  | 42848324 | 41476397 | G | A | intron_variant | 0       | 0       | 0      | 0       | 0      | 0    | 0.01111 | 0      | 0       | 0     |
| 250 | COSV59826599 | 42848363 | 41476436 | A | C | intron_variant | 0       | 0       | 0      | 0       | 0      | 0.02 | 0       | 0      | 0       | 0     |
| 251 | rs113034290  | 42848371 | 41476444 | T | C | intron_variant | 0       | 0       | 0      | 0       | 0      | 0    | 0       | 0      | 0       | 0     |
| 252 | rs111383922  | 42848398 | 41476471 | T | C | intron_variant | 0       | 0       | 0      | 0       | 0      | 0    | 0       | 0      | 0       | 0     |
| 253 | rs75756279   | 42848457 | 41476530 | T | C | intron_variant | 0       | 0       | 0      | 0.03846 | 0.0099 | 0    | 0       | 0      | 0       | 0     |
| 254 | rs200615061  | 42848494 | 41476567 | C | A | intron_variant | 0       | 0       | 0      | 0.01282 | 0      | 0    | 0       | 0      | 0       | 0     |
| 255 | rs74423429   | 42848579 | 41476652 | A | G | intron_variant | 0       | 0       | 0.0417 | 0.01282 | 0.0347 | 0    | 0       | 0      | 0       | 0     |
| 256 | rs1043973308 | 42848580 | 41476653 | G | A | intron_variant | 0       | 0       | 0      | 0       | 0      | 0    | 0.01111 | 0      | 0       | 0     |
| 257 | rs375891843  | 42848591 | 41476664 | G | T | intron_variant | 0       | 0       | 0      | 0       | 0.005  | 0    | 0       | 0      | 0       | 0     |
| 258 | -            | 42848602 | 41476675 | C | T | intron_variant | 0.03846 | 0.03846 | 0      | 0       | 0      | 0    | 0       | 0      | 0       | 0     |
| 259 | rs1303041038 | 42848640 | 41476713 | A | C | intron_variant | 0       | 0       | 0      | 0       | 0      | 0    | 0       | 0      | 0.00463 | 0     |
| 260 | rs9985159    | 42848684 | 41476757 | T | C | intron_variant | 0.3462  | 0.3462  | 0.3125 | 0.2436  | 0.3119 | 0.24 | 0.4778  | 0.4444 | 0.3102  | 0.075 |
| 261 | rs148136016  | 42848689 | 41476762 | G | A | intron_variant | 0       | 0       | 0      | 0       | 0      | 0    | 0       | 0      | 0       | 0     |
| 262 | rs113506821  | 42848747 | 41476820 | T | C | intron_variant | 0.07692 | 0.07692 | 0.1042 | 0.07692 | 0.0891 | 0.04 | 0       | 0      | 0.1343  | 0     |
| 263 | rs931996263  | 42848765 | 41476838 | C | T | intron_variant | 0       | 0       | 0      | 0       | 0      | 0    | 0.01111 | 0      | 0       | 0     |
| 264 | rs118108663  | 42848819 | 41476892 | T | C | intron_variant | 0       | 0       | 0      | 0       | 0      | 0    | 0       | 0      | 0.03704 | 0     |
| 265 | rs76973757   | 42848821 | 41476894 | A | G | intron_variant | 0       | 0       | 0      | 0       | 0      | 0    | 0       | 0      | 0       | 0     |
| 266 | -            | 42848835 | 41476908 | T | C | intron_variant | 0.07692 | 0.07692 | 0.375  | 0.2692  | 0.3416 | 0.36 | 0.3444  | 0.2222 | 0.3796  | 0.075 |
| 267 | rs1380427461 | 42848924 | 41476997 | C | T | intron_variant | 0       | 0       | 0      | 0       | 0      | 0    | 0       | 0      | 0       | 0.025 |
| 268 | rs375837256  | 42848951 | 41477024 | G | A | intron_variant | 0       | 0       | 0      | 0       | 0      | 0    | 0.03333 | 0      | 0       | 0     |
| 269 | -            | 42849089 | 41477162 | C | T | intron_variant | 0       | 0       | 0      | 0       | 0      | 0    | 0       | 0      | 0       | 0.025 |
| 270 | -            | 42849097 | 41477170 | G | A | intron_variant | 0.07692 | 0.07692 | 0.3958 | 0.2692  | 0.3515 | 0.36 | 0.3444  | 0.2222 | 0.3796  | 0.075 |
| 271 | rs886737856  | 42849102 | 41477175 | T | C | intron_variant | 0       | 0       | 0      | 0.01282 | 0      | 0    | 0       | 0      | 0       | 0     |
| 272 | -            | 42849137 | 41477210 | T | C | intron_variant | 0.07692 | 0.07692 | 0.3958 | 0.2692  | 0.3515 | 0.36 | 0.3444  | 0.2222 | 0.3796  | 0.075 |
| 273 | rs150633108  | 42849163 | 41477236 | T | C | intron_variant | 0       | 0       | 0      | 0       | 0      | 0.04 | 0.01111 | 0      | 0.00463 | 0     |

|     |              |          |          |   |   |                |         |         |        |         |        |      |         |         |         |       |
|-----|--------------|----------|----------|---|---|----------------|---------|---------|--------|---------|--------|------|---------|---------|---------|-------|
| 274 | rs58978895   | 42849228 | 41477301 | T | C | intron_variant | 0       | 0       | 0      | 0       | 0      | 0.06 | 0.02222 | 0.02778 | 0       | 0.05  |
| 275 | -            | 42849242 | 41477315 | C | T | intron_variant | 0.07692 | 0.07692 | 0.3958 | 0.2821  | 0.3515 | 0.36 | 0.3444  | 0.2222  | 0.3796  | 0.075 |
| 276 | -            | 42849258 | 41477331 | C | T | intron_variant | 0.07692 | 0.07692 | 0.3958 | 0.2821  | 0.3515 | 0.36 | 0.3444  | 0.2222  | 0.3796  | 0.075 |
| 277 | rs561179495  | 42849383 | 41477456 | T | C | intron_variant | 0       | 0       | 0      | 0       | 0      | 0    | 0       | 0       | 0       | 0     |
| 278 | rs144576889  | 42849576 | 41477649 | G | A | intron_variant | 0       | 0       | 0      | 0       | 0      | 0    | 0       | 0       | 0       | 0     |
| 279 | rs565720190  | 42849702 | 41477775 | A | G | intron_variant | 0       | 0       | 0      | 0       | 0      | 0.02 | 0       | 0       | 0       | 0     |
| 280 | -            | 42849773 | 41477846 | A | C | intron_variant | 0       | 0       | 0      | 0       | 0      | 0    | 0       | 0       | 0.00463 | 0     |
| 281 | -            | 42849781 | 41477854 | A | C | intron_variant | 0       | 0       | 0      | 0.01282 | 0.005  | 0    | 0       | 0       | 0.00463 | 0     |
| 282 | -            | 42849783 | 41477856 | A | G | intron_variant | 0       | 0       | 0      | 0       | 0      | 0    | 0       | 0       | 0       | 0     |
| 283 | rs548267325  | 42849802 | 41477875 | A | G | intron_variant | 0       | 0       | 0      | 0       | 0.005  | 0    | 0       | 0       | 0       | 0     |
| 284 | rs61325328   | 42849821 | 41477894 | G | A | intron_variant | 0       | 0       | 0      | 0       | 0      | 0    | 0       | 0       | 0       | 0     |
| 285 | -            | 42849893 | 41477966 | A | G | intron_variant | 0       | 0       | 0      | 0       | 0      | 0    | 0       | 0.02778 | 0       | 0     |
| 286 | rs576215861  | 42849909 | 41477982 | A | C | intron_variant | 0       | 0       | 0      | 0       | 0      | 0    | 0       | 0       | 0       | 0     |
| 287 | rs953081299  | 42849917 | 41477990 | T | C | intron_variant | 0       | 0       | 0      | 0       | 0      | 0    | 0.01111 | 0       | 0       | 0     |
| 288 | rs1259681953 | 42849918 | 41477991 | A | G | intron_variant | 0       | 0       | 0      | 0       | 0      | 0.02 | 0       | 0       | 0       | 0     |
| 289 | -            | 42849929 | 41478002 | T | C | intron_variant | 0       | 0       | 0      | 0       | 0      | 0    | 0       | 0       | 0       | 0     |
| 290 | rs115967323  | 42849951 | 41478024 | T | C | intron_variant | 0       | 0       | 0      | 0       | 0      | 0    | 0       | 0       | 0       | 0     |
| 291 | -            | 42850038 | 41478111 | C | T | intron_variant | 0       | 0       | 0      | 0       | 0      | 0    | 0       | 0       | 0       | 0.025 |
| 292 | rs9636988    | 42850045 | 41478118 | C | T | intron_variant | 0.2692  | 0.2692  | 0.3333 | 0.2564  | 0.2475 | 0.24 | 0.2222  | 0.1667  | 0.1944  | 0.275 |
| 293 | -            | 42850051 | 41478124 | T | G | intron_variant | 0       | 0       | 0      | 0       | 0      | 0    | 0       | 0       | 0       | 0.025 |
| 294 | rs4818239    | 42850075 | 41478148 | C | T | intron_variant | 0.07692 | 0.07692 | 0.2708 | 0.4487  | 0.4158 | 0.4  | 0.04444 | 0.08333 | 0.1759  | 0.325 |
| 295 | rs116170128  | 42850110 | 41478183 | C | A | intron_variant | 0       | 0       | 0.0208 | 0.01282 | 0.0347 | 0.02 | 0.01111 | 0       | 0       | 0.05  |
| 296 | rs543337196  | 42850238 | 41478311 | T | C | intron_variant | 0       | 0       | 0      | 0       | 0      | 0.02 | 0       | 0       | 0       | 0     |
| 297 | rs139816990  | 42850239 | 41478312 | A | G | intron_variant | 0       | 0       | 0      | 0       | 0      | 0    | 0       | 0       | 0       | 0     |
| 298 | rs9983330    | 42850253 | 41478326 | G | A | intron_variant | 0.07692 | 0.07692 | 0.3333 | 0.2692  | 0.3168 | 0.18 | 0.4778  | 0.3889  | 0.3194  | 0.025 |
| 299 | -            | 42850281 | 41478354 | T | C | intron_variant | 0       | 0       | 0      | 0       | 0      | 0    | 0       | 0       | 0.00463 | 0     |
| 300 | rs116577479  | 42850370 | 41478443 | A | G | intron_variant | 0       | 0       | 0      | 0       | 0      | 0    | 0       | 0       | 0       | 0     |
| 301 | -            | 42850549 | 41478622 | G | A | intron_variant | 0       | 0       | 0      | 0       | 0      | 0    | 0       | 0       | 0.00926 | 0     |
| 302 | rs1339402659 | 42850749 | 41478822 | G | T | intron_variant | 0       | 0       | 0      | 0       | 0      | 0    | 0       | 0.02778 | 0       | 0     |
| 303 | rs374961008  | 42850870 | 41478943 | T | C | intron_variant | 0       | 0       | 0      | 0       | 0      | 0    | 0       | 0       | 0       | 0     |
| 304 | rs73372191   | 42850882 | 41478955 | T | A | intron_variant | 0       | 0       | 0      | 0       | 0      | 0.06 | 0.02222 | 0.02778 | 0       | 0.05  |
| 305 | rs9974995    | 42850911 | 41478984 | T | C | intron_variant | 0.2692  | 0.2692  | 0.3333 | 0.2692  | 0.2475 | 0.24 | 0.2222  | 0.1667  | 0.1852  | 0.25  |
| 306 | rs766178676  | 42850916 | 41478989 | C | T | intron_variant | 0       | 0       | 0      | 0       | 0      | 0    | 0       | 0       | 0       | 0.025 |
| 307 | rs893281455  | 42850933 | 41479006 | A | C | intron_variant | 0       | 0       | 0      | 0       | 0      | 0    | 0       | 0       | 0       | 0.025 |
| 308 | -            | 42850957 | 41479030 | T | C | intron_variant | 0       | 0       | 0      | 0.01282 | 0      | 0    | 0       | 0       | 0       | 0     |

|     |              |          |          |   |   |                    |         |         |        |         |        |      |         |         |         |       |
|-----|--------------|----------|----------|---|---|--------------------|---------|---------|--------|---------|--------|------|---------|---------|---------|-------|
| 309 | rs73372193   | 42850966 | 41479039 | C | A | intron_variant     | 0       | 0       | 0      | 0       | 0      | 0.06 | 0.02222 | 0.02778 | 0       | 0.05  |
| 310 | rs9974933    | 42850977 | 41479050 | G | A | intron_variant     | 0.2692  | 0.2692  | 0.3333 | 0.2692  | 0.2475 | 0.24 | 0.2222  | 0.1944  | 0.1852  | 0.25  |
| 311 | rs9975014    | 42851006 | 41479079 | G | A | intron_variant     | 0.2692  | 0.2692  | 0.3333 | 0.2692  | 0.2475 | 0.24 | 0.2222  | 0.1944  | 0.1852  | 0.25  |
| 312 | rs141788162  | 42851134 | 41479207 | A | G | synonymous_variant | 0       | 0       | 0      | 0       | 0.0198 | 0    | 0       | 0       | 0.05556 | 0     |
| 313 | rs201661208  | 42851135 | 41479208 | A | G | missense_variant   | 0       | 0       | 0      | 0       | 0      | 0    | 0       | 0       | 0       | 0.025 |
| 314 | rs112247445  | 42851257 | 41479330 | T | C | intron_variant     | 0       | 0       | 0      | 0       | 0      | 0    | 0       | 0       | 0       | 0     |
| 315 | rs377385043  | 42851258 | 41479331 | G | A | intron_variant     | 0       | 0       | 0      | 0.01282 | 0      | 0    | 0       | 0       | 0       | 0     |
| 316 | rs112985398  | 42851268 | 41479341 | C | T | intron_variant     | 0       | 0       | 0      | 0       | 0      | 0    | 0       | 0       | 0       | 0     |
| 317 | rs145292327  | 42851303 | 41479376 | G | A | intron_variant     | 0       | 0       | 0      | 0       | 0      | 0    | 0.01111 | 0       | 0       | 0     |
| 318 | -            | 42851310 | 41479383 | A | G | intron_variant     | 0       | 0       | 0      | 0.01282 | 0      | 0    | 0       | 0       | 0       | 0     |
| 319 | rs538022064  | 42851370 | 41479443 | C | T | intron_variant     | 0       | 0       | 0      | 0       | 0      | 0    | 0       | 0       | 0       | 0     |
| 320 | rs117432315  | 42851374 | 41479447 | A | G | intron_variant     | 0       | 0       | 0.0208 | 0       | 0      | 0    | 0       | 0       | 0       | 0     |
| 321 | rs137871202  | 42851376 | 41479449 | C | T | intron_variant     | 0       | 0       | 0      | 0       | 0      | 0    | 0       | 0       | 0       | 0     |
| 322 | rs199575615  | 42851419 | 41479492 | G | A | intron_variant     | 0       | 0       | 0      | 0       | 0      | 0    | 0       | 0       | 0.00926 | 0     |
| 323 | rs117941520  | 42851423 | 41479496 | A | G | intron_variant     | 0       | 0       | 0      | 0       | 0      | 0.02 | 0       | 0       | 0.00463 | 0     |
| 324 | rs915823     | 42851454 | 41479527 | C | A | intron_variant     | 0.07692 | 0.07692 | 0.25   | 0.1795  | 0.2871 | 0.08 | 0.1778  | 0.3333  | 0.2546  | 0.05  |
| 325 | -            | 42851575 | 41479648 | G | T | intron_variant     | 0       | 0       | 0      | 0.01282 | 0      | 0    | 0       | 0       | 0       | 0     |
| 326 | -            | 42851578 | 41479651 | A | C | intron_variant     | 0       | 0       | 0.0208 | 0       | 0      | 0    | 0       | 0       | 0       | 0     |
| 327 | -            | 42851588 | 41479661 | G | C | intron_variant     | 0       | 0       | 0      | 0       | 0      | 0    | 0.03333 | 0       | 0       | 0     |
| 328 | rs184380117  | 42851644 | 41479717 | A | G | intron_variant     | 0       | 0       | 0.0417 | 0       | 0      | 0    | 0       | 0       | 0.02778 | 0     |
| 329 | rs553747026  | 42851723 | 41479796 | G | A | intron_variant     | 0       | 0       | 0      | 0.01282 | 0      | 0    | 0       | 0       | 0       | 0     |
| 330 | rs1368879178 | 42851727 | 41479800 | G | A | intron_variant     | 0       | 0       | 0      | 0       | 0      | 0    | 0       | 0       | 0.01852 | 0     |
| 331 | rs1051561804 | 42851731 | 41479804 | C | T | intron_variant     | 0       | 0       | 0      | 0       | 0      | 0    | 0       | 0       | 0       | 0     |
| 332 | rs875393     | 42851815 | 41479888 | A | G | intron_variant     | 0       | 0       | 0.1458 | 0.07692 | 0.1139 | 0.04 | 0.1222  | 0.1944  | 0.1944  | 0.025 |
| 333 | rs184764113  | 42851826 | 41479899 | A | G | intron_variant     | 0       | 0       | 0      | 0       | 0      | 0    | 0.03333 | 0       | 0       | 0     |
| 334 | rs372876361  | 42851846 | 41479919 | T | G | intron_variant     | 0       | 0       | 0      | 0       | 0      | 0    | 0.02222 | 0       | 0       | 0     |
| 335 | -            | 42851931 | 41480004 | C | T | intron_variant     | 0       | 0       | 0      | 0       | 0      | 0    | 0       | 0       | 0       | 0     |
| 336 | rs149601802  | 42851965 | 41480038 | T | C | intron_variant     | 0       | 0       | 0      | 0       | 0      | 0    | 0       | 0       | 0.00463 | 0     |
| 337 | rs967358213  | 42852025 | 41480098 | T | C | intron_variant     | 0       | 0       | 0      | 0       | 0      | 0.02 | 0       | 0       | 0       | 0     |
| 338 | rs734055     | 42852170 | 41480243 | A | T | intron_variant     | 0       | 0       | 0      | 0       | 0.005  | 0    | 0       | 0       | 0       | 0     |
| 339 | rs1035659632 | 42852258 | 41480331 | G | T | intron_variant     | 0       | 0       | 0      | 0       | 0      | 0    | 0.01111 | 0       | 0       | 0     |
| 340 | rs34561135   | 42852311 | 41480384 | A | G | intron_variant     | 0       | 0       | 0.0417 | 0.05128 | 0.0891 | 0.04 | 0       | 0       | 0.02315 | 0.025 |
| 341 | rs373852195  | 42852316 | 41480389 | A | G | intron_variant     | 0       | 0       | 0      | 0       | 0.0149 | 0    | 0.06667 | 0       | 0       | 0     |
| 342 | rs734056     | 42852320 | 41480393 | A | C | intron_variant     | 0.07692 | 0.07692 | 0.2708 | 0.4231  | 0.4059 | 0.4  | 0.04444 | 0.05556 | 0.1713  | 0.35  |
| 343 | rs186734573  | 42852365 | 41480438 | T | C | intron_variant     | 0       | 0       | 0      | 0       | 0.0099 | 0    | 0       | 0       | 0       | 0     |

|     |              |          |          |   |   |                    |         |         |        |         |        |      |         |         |         |       |
|-----|--------------|----------|----------|---|---|--------------------|---------|---------|--------|---------|--------|------|---------|---------|---------|-------|
| 344 | rs79397218   | 42852382 | 41480455 | T | C | intron_variant     | 0       | 0       | 0      | 0       | 0      | 0    | 0       | 0       | 0       | 0     |
| 345 | rs61735789   | 42852435 | 41480508 | A | G | synonymous_variant | 0       | 0       | 0.0208 | 0.01282 | 0.0099 | 0    | 0       | 0       | 0       | 0     |
| 346 | rs12329760   | 42852497 | 41480570 | T | C | missense_variant   | 0.07692 | 0.07692 | 0.3333 | 0.2821  | 0.3168 | 0.18 | 0.4444  | 0.3056  | 0.3194  | 0.05  |
| 347 | -            | 42852545 | 41480618 | A | G | intron_variant     | 0       | 0       | 0      | 0       | 0      | 0    | 0.01111 | 0       | 0       | 0     |
| 348 | rs378501     | 42852591 | 41480664 | G | A | intron_variant     | 0       | 0       | 0      | 0       | 0      | 0    | 0.05556 | 0.1111  | 0       | 0     |
| 349 | rs1601575263 | 42852673 | 41480746 | A | C | intron_variant     | 0       | 0       | 0      | 0       | 0      | 0    | 0       | 0       | 0.00463 | 0     |
| 350 | rs1181456418 | 42852722 | 41480795 | T | C | intron_variant     | 0       | 0       | 0      | 0       | 0      | 0    | 0       | 0       | 0.00463 | 0     |
| 351 | rs370654859  | 42852797 | 41480870 | C | T | intron_variant     | 0       | 0       | 0      | 0       | 0      | 0    | 0       | 0       | 0       | 0     |
| 352 | -            | 42852847 | 41480920 | A | G | intron_variant     | 0       | 0       | 0      | 0       | 0      | 0    | 0       | 0       | 0       | 0     |
| 353 | rs866828358  | 42852904 | 41480977 | T | C | intron_variant     | 0       | 0       | 0.0208 | 0       | 0      | 0    | 0       | 0       | 0       | 0     |
| 354 | rs935832638  | 42852907 | 41480980 | A | G | intron_variant     | 0       | 0       | 0      | 0       | 0      | 0    | 0       | 0       | 0       | 0     |
| 355 | rs112209215  | 42852922 | 41480995 | A | G | intron_variant     | 0       | 0       | 0      | 0       | 0      | 0    | 0       | 0       | 0       | 0     |
| 356 | rs75833467   | 42852952 | 41481025 | A | G | intron_variant     | 0       | 0       | 0      | 0.03846 | 0.0347 | 0    | 0       | 0       | 0.00463 | 0.05  |
| 357 | -            | 42853026 | 41481099 | C | T | intron_variant     | 0.03846 | 0.03846 | 0      | 0       | 0      | 0    | 0       | 0       | 0       | 0     |
| 358 | rs370641046  | 42853045 | 41481118 | T | C | intron_variant     | 0       | 0       | 0      | 0       | 0      | 0    | 0       | 0       | 0       | 0.025 |
| 359 | rs4290734    | 42853083 | 41481156 | G | A | intron_variant     | 0.07692 | 0.07692 | 0.2708 | 0.4231  | 0.4059 | 0.4  | 0.04444 | 0.05556 | 0.1713  | 0.375 |
| 360 | rs1244375280 | 42853121 | 41481194 | A | G | intron_variant     | 0       | 0       | 0      | 0       | 0      | 0    | 0       | 0       | 0       | 0     |
| 361 | rs1569018086 | 42853239 | 41481312 | T | C | intron_variant     | 0       | 0       | 0      | 0       | 0      | 0    | 0.01111 | 0       | 0       | 0     |
| 362 | rs149708827  | 42853243 | 41481316 | T | G | intron_variant     | 0       | 0       | 0      | 0       | 0      | 0    | 0.04444 | 0       | 0       | 0     |
| 363 | -            | 42853301 | 41481374 | A | G | intron_variant     | 0       | 0       | 0      | 0       | 0      | 0    | 0       | 0       | 0.00463 | 0     |
| 364 | rs544784789  | 42853341 | 41481414 | G | A | intron_variant     | 0       | 0       | 0      | 0       | 0      | 0.02 | 0       | 0       | 0       | 0     |
| 365 | rs1312825450 | 42853470 | 41481543 | C | T | intron_variant     | 0       | 0       | 0      | 0       | 0      | 0    | 0       | 0       | 0.00463 | 0     |
| 366 | rs952095916  | 42853500 | 41481573 | A | T | intron_variant     | 0       | 0       | 0      | 0       | 0      | 0    | 0.01111 | 0       | 0       | 0     |
| 367 | rs200072801  | 42854102 | 41482175 | G | A | intron_variant     | 0       | 0       | 0      | 0       | 0      | 0    | 0       | 0.02778 | 0       | 0     |
| 368 | -            | 42854118 | 41482191 | G | T | intron_variant     | 0       | 0       | 0      | 0.01282 | 0      | 0    | 0       | 0       | 0       | 0     |
| 369 | rs111620846  | 42854144 | 41482217 | A | C | intron_variant     | 0       | 0       | 0      | 0       | 0      | 0    | 0       | 0       | 0       | 0     |
| 370 | rs2276205    | 42854203 | 41482276 | G | A | intron_variant     | 0       | 0       | 0.1875 | 0.1026  | 0.1287 | 0.04 | 0.1222  | 0.1667  | 0.2546  | 0.025 |
| 371 | rs578103765  | 42854205 | 41482278 | T | C | intron_variant     | 0       | 0       | 0      | 0       | 0      | 0    | 0       | 0       | 0       | 0     |
| 372 | rs144033559  | 42854343 | 41482416 | C | G | intron_variant     | 0       | 0       | 0      | 0       | 0      | 0    | 0       | 0       | 0       | 0     |
| 373 | rs118134524  | 42854376 | 41482449 | A | G | intron_variant     | 0       | 0       | 0      | 0       | 0      | 0    | 0       | 0.02778 | 0.00463 | 0     |
| 374 | rs527489879  | 42854400 | 41482473 | C | T | intron_variant     | 0       | 0       | 0      | 0       | 0      | 0    | 0       | 0.02778 | 0       | 0     |
| 375 | rs930977615  | 42854436 | 41482509 | C | T | intron_variant     | 0       | 0       | 0      | 0       | 0      | 0    | 0.01111 | 0       | 0       | 0     |
| 376 | rs112753686  | 42854460 | 41482533 | T | C | intron_variant     | 0       | 0       | 0      | 0       | 0      | 0    | 0       | 0       | 0       | 0     |
| 377 | rs900993466  | 42854525 | 41482598 | C | T | intron_variant     | 0       | 0       | 0      | 0       | 0      | 0    | 0.01111 | 0       | 0       | 0     |
| 378 | -            | 42854637 | 41482710 | C | G | intron_variant     | 0       | 0       | 0      | 0       | 0      | 0.02 | 0       | 0       | 0       | 0     |



|     |              |          |          |   |   |                |         |         |        |         |        |      |         |         |         |       |
|-----|--------------|----------|----------|---|---|----------------|---------|---------|--------|---------|--------|------|---------|---------|---------|-------|
| 414 | rs11702475   | 42857568 | 41485641 | T | C | intron_variant | 0.07692 | 0.07692 | 0.2708 | 0.4231  | 0.396  | 0.42 | 0.04444 | 0.05556 | 0.1713  | 0.4   |
| 415 | -            | 42857642 | 41485715 | T | C | intron_variant | 0       | 0       | 0      | 0       | 0      | 0    | 0.02222 | 0       | 0       | 0     |
| 416 | rs2257202    | 42857715 | 41485788 | C | T | intron_variant | 0.2692  | 0.2692  | 0.2917 | 0.2436  | 0.2426 | 0.24 | 0.2222  | 0.1944  | 0.1528  | 0.25  |
| 417 | rs746347660  | 42857750 | 41485823 | A | G | intron_variant | 0       | 0       | 0      | 0       | 0      | 0    | 0       | 0       | 0       | 0.05  |
| 418 | rs118108194  | 42857755 | 41485828 | G | A | intron_variant | 0       | 0       | 0      | 0       | 0      | 0    | 0       | 0       | 0       | 0     |
| 419 | rs1043408573 | 42857809 | 41485882 | T | C | intron_variant | 0       | 0       | 0.0208 | 0       | 0      | 0    | 0       | 0       | 0       | 0     |
| 420 | rs752423992  | 42857830 | 41485903 | T | C | intron_variant | 0       | 0       | 0      | 0       | 0.005  | 0    | 0       | 0       | 0       | 0     |
| 421 | rs1262043781 | 42857893 | 41485966 | G | A | intron_variant | 0       | 0       | 0.0208 | 0       | 0      | 0    | 0       | 0       | 0       | 0     |
| 422 | rs62217531   | 42857901 | 41485974 | T | C | intron_variant | 0.07692 | 0.07692 | 0.2292 | 0.3974  | 0.3861 | 0.46 | 0.06667 | 0.08333 | 0.1667  | 0.375 |
| 423 | rs1601579713 | 42857940 | 41486013 | T | G | intron_variant | 0       | 0       | 0      | 0       | 0.005  | 0    | 0       | 0       | 0       | 0     |
| 424 | rs144052153  | 42857954 | 41486027 | G | T | intron_variant | 0       | 0       | 0      | 0       | 0      | 0    | 0       | 0       | 0.02315 | 0     |
| 425 | rs2298857    | 42857981 | 41486054 | A | G | intron_variant | 0.2692  | 0.2692  | 0.2917 | 0.2436  | 0.2426 | 0.3  | 0.2444  | 0.2222  | 0.1528  | 0.35  |
| 426 | -            | 42857985 | 41486058 | C | T | intron_variant | 0       | 0       | 0      | 0       | 0      | 0    | 0       | 0       | 0       | 0     |
| 427 | -            | 42858054 | 41486127 | C | G | intron_variant | 0       | 0       | 0      | 0       | 0      | 0    | 0       | 0       | 0       | 0     |
| 428 | rs572593241  | 42858080 | 41486153 | T | C | intron_variant | 0       | 0       | 0      | 0       | 0      | 0    | 0       | 0       | 0       | 0.025 |
| 429 | rs182791541  | 42858096 | 41486169 | T | A | intron_variant | 0       | 0       | 0      | 0       | 0      | 0    | 0       | 0       | 0       | 0.025 |
| 430 | rs539934676  | 42858142 | 41486215 | A | G | intron_variant | 0       | 0       | 0      | 0       | 0      | 0    | 0       | 0       | 0       | 0.025 |
| 431 | -            | 42858367 | 41486440 | T | C | intron_variant | 0.3077  | 0.3077  | 0.2917 | 0.4231  | 0.4109 | 0.42 | 0.2889  | 0.4167  | 0.4491  | 0.375 |
| 432 | rs752183643  | 42858375 | 41486448 | T | C | intron_variant | 0       | 0       | 0      | 0       | 0      | 0    | 0       | 0       | 0       | 0     |
| 433 | rs564834372  | 42858408 | 41486481 | C | G | intron_variant | 0       | 0       | 0      | 0       | 0.005  | 0    | 0       | 0       | 0       | 0     |
| 434 | rs139467735  | 42858441 | 41486514 | T | G | intron_variant | 0       | 0       | 0      | 0       | 0      | 0    | 0       | 0       | 0       | 0.025 |
| 435 | rs546775580  | 42858460 | 41486533 | T | C | intron_variant | 0       | 0       | 0      | 0       | 0      | 0    | 0.01111 | 0       | 0       | 0     |
| 436 | rs182336392  | 42858499 | 41486572 | G | A | intron_variant | 0       | 0       | 0      | 0       | 0.005  | 0    | 0       | 0       | 0       | 0     |
| 437 | rs149676870  | 42858520 | 41486593 | T | C | intron_variant | 0.2692  | 0.2692  | 0      | 0       | 0      | 0    | 0       | 0       | 0       | 0     |
| 438 | -            | 42858549 | 41486622 | A | G | intron_variant | 0       | 0       | 0      | 0       | 0      | 0    | 0.01111 | 0       | 0       | 0     |
| 439 | rs779138284  | 42858594 | 41486667 | T | C | intron_variant | 0       | 0       | 0      | 0       | 0.005  | 0    | 0       | 0       | 0       | 0     |
| 440 | rs193122175  | 42858697 | 41486770 | T | C | intron_variant | 0       | 0       | 0      | 0       | 0      | 0    | 0       | 0       | 0       | 0     |
| 441 | rs364289     | 42858865 | 41486938 | A | G | intron_variant | 0.2692  | 0.2692  | 0.2917 | 0.2308  | 0.2376 | 0.3  | 0.2778  | 0.3056  | 0.1528  | 0.35  |
| 442 | -            | 42858868 | 41486941 | G | A | intron_variant | 0.03846 | 0.03846 | 0      | 0       | 0      | 0    | 0       | 0       | 0       | 0     |
| 443 | rs370363307  | 42858874 | 41486947 | T | A | intron_variant | 0       | 0       | 0      | 0       | 0      | 0    | 0.03333 | 0.02778 | 0.00926 | 0     |
| 444 | rs149226336  | 42858936 | 41487009 | G | C | intron_variant | 0       | 0       | 0      | 0.01282 | 0.005  | 0    | 0.03333 | 0.02778 | 0.03241 | 0     |
| 445 | rs903787356  | 42858958 | 41487031 | C | T | intron_variant | 0       | 0       | 0.0208 | 0       | 0      | 0    | 0       | 0       | 0       | 0     |
| 446 | -            | 42858990 | 41487063 | C | G | intron_variant | 0       | 0       | 0      | 0       | 0      | 0    | 0.02222 | 0       | 0       | 0     |
| 447 | rs79468500   | 42858995 | 41487068 | G | T | intron_variant | 0       | 0       | 0.0208 | 0.01282 | 0.0347 | 0.02 | 0.01111 | 0       | 0       | 0.025 |
| 448 | rs80275470   | 42859054 | 41487127 | A | G | intron_variant | 0       | 0       | 0      | 0       | 0.0198 | 0    | 0       | 0       | 0       | 0     |





|     |              |          |          |   |   |                  |         |         |        |         |        |      |         |         |         |       |
|-----|--------------|----------|----------|---|---|------------------|---------|---------|--------|---------|--------|------|---------|---------|---------|-------|
| 484 | rs2298664    | 42861181 | 41489254 | C | G | intron_variant   | 0.07692 | 0.07692 | 0.4167 | 0.3462  | 0.3416 | 0.18 | 0.4556  | 0.3056  | 0.3935  | 0.1   |
| 485 | rs1191882308 | 42861203 | 41489276 | A | G | intron_variant   | 0       | 0       | 0      | 0       | 0      | 0    | 0.01111 | 0       | 0       | 0     |
| 486 | rs1426886770 | 42861289 | 41489362 | T | G | intron_variant   | 0       | 0       | 0.0208 | 0       | 0      | 0    | 0       | 0       | 0       | 0     |
| 487 | rs429442     | 42861332 | 41489405 | T | C | intron_variant   | 0.2692  | 0.2692  | 0.2917 | 0.2308  | 0.2426 | 0.32 | 0.2667  | 0.3056  | 0.1528  | 0.325 |
| 488 | rs151152524  | 42861368 | 41489441 | C | A | intron_variant   | 0       | 0       | 0      | 0       | 0      | 0    | 0       | 0       | 0       | 0     |
| 489 | rs768426172  | 42861473 | 41489546 | T | C | missense_variant | 0       | 0       | 0      | 0       | 0      | 0    | 0.02222 | 0       | 0       | 0     |
| 490 | rs190265904  | 42861476 | 41489549 | A | G | missense_variant | 0       | 0       | 0      | 0       | 0      | 0    | 0       | 0       | 0.01389 | 0     |
| 491 | rs144948620  | 42861545 | 41489618 | A | G | intron_variant   | 0       | 0       | 0      | 0       | 0.0149 | 0    | 0       | 0       | 0       | 0     |
| 492 | rs371894730  | 42861591 | 41489664 | C | T | intron_variant   | 0       | 0       | 0      | 0       | 0      | 0    | 0       | 0       | 0       | 0     |
| 493 | rs373622147  | 42861764 | 41489837 | C | T | intron_variant   | 0       | 0       | 0      | 0       | 0      | 0    | 0       | 0       | 0       | 0     |
| 494 | rs141764184  | 42861794 | 41489867 | A | G | intron_variant   | 0       | 0       | 0      | 0       | 0      | 0    | 0.08889 | 0       | 0       | 0     |
| 495 | rs199704982  | 42861935 | 41490008 | T | C | intron_variant   | 0       | 0       | 0      | 0       | 0      | 0    | 0       | 0       | 0.02315 | 0     |
| 496 | rs192666663  | 42861936 | 41490009 | A | G | intron_variant   | 0       | 0       | 0      | 0       | 0      | 0    | 0       | 0.02778 | 0       | 0     |
| 497 | rs147099383  | 42861959 | 41490032 | C | T | intron_variant   | 0       | 0       | 0.0833 | 0.07692 | 0.0297 | 0.1  | 0.3333  | 0.08333 | 0.06481 | 0     |
| 498 | rs11911394   | 42862275 | 41490348 | C | T | intron_variant   | 0.07692 | 0.07692 | 0.4167 | 0.3333  | 0.3366 | 0.24 | 0.4556  | 0.3056  | 0.3611  | 0.175 |
| 499 | rs189040987  | 42862333 | 41490406 | C | G | intron_variant   | 0       | 0       | 0      | 0       | 0      | 0    | 0       | 0       | 0.00463 | 0     |
| 500 | rs561412657  | 42862367 | 41490440 | G | A | intron_variant   | 0       | 0       | 0      | 0       | 0.005  | 0    | 0       | 0       | 0       | 0     |
| 501 | rs192259532  | 42862416 | 41490489 | T | G | intron_variant   | 0       | 0       | 0      | 0       | 0      | 0    | 0       | 0       | 0       | 0     |
| 502 | rs1315753045 | 42862485 | 41490558 | G | T | intron_variant   | 0       | 0       | 0      | 0       | 0      | 0    | 0.03333 | 0       | 0       | 0     |
| 503 | rs928871     | 42862531 | 41490604 | T | C | intron_variant   | 0.07692 | 0.07692 | 0.4167 | 0.3333  | 0.3366 | 0.24 | 0.4778  | 0.3056  | 0.3611  | 0.175 |
| 504 | rs1266169667 | 42862605 | 41490678 | T | C | intron_variant   | 0       | 0       | 0      | 0       | 0      | 0    | 0       | 0       | 0       | 0     |
| 505 | -            | 42862676 | 41490749 | G | A | intron_variant   | 0       | 0       | 0.0208 | 0       | 0      | 0    | 0       | 0       | 0       | 0     |
| 506 | rs370823400  | 42862693 | 41490766 | A | G | intron_variant   | 0       | 0       | 0      | 0       | 0      | 0    | 0.06667 | 0       | 0       | 0     |
| 507 | rs116865960  | 42862768 | 41490841 | A | G | intron_variant   | 0       | 0       | 0.0208 | 0       | 0.0149 | 0    | 0       | 0       | 0       | 0.025 |
| 508 | rs528452414  | 42862848 | 41490921 | C | A | intron_variant   | 0       | 0       | 0      | 0.01282 | 0.0099 | 0    | 0       | 0       | 0       | 0     |
| 509 | rs115596471  | 42862869 | 41490942 | A | G | intron_variant   | 0       | 0       | 0      | 0       | 0      | 0    | 0       | 0       | 0       | 0     |
| 510 | rs149173609  | 42862892 | 41490965 | T | C | intron_variant   | 0       | 0       | 0      | 0       | 0      | 0    | 0       | 0       | 0.00463 | 0     |
| 511 | rs184365262  | 42862918 | 41490991 | T | C | intron_variant   | 0       | 0       | 0      | 0       | 0.005  | 0    | 0       | 0       | 0       | 0     |
| 512 | -            | 42862924 | 41490997 | A | G | intron_variant   | 0       | 0       | 0      | 0       | 0.005  | 0    | 0       | 0       | 0.00463 | 0     |
| 513 | rs570544092  | 42862927 | 41491000 | T | C | intron_variant   | 0       | 0       | 0      | 0       | 0.005  | 0    | 0       | 0       | 0.00463 | 0     |
| 514 | rs6517669    | 42862936 | 41491009 | G | A | intron_variant   | 0.07692 | 0.07692 | 0.4167 | 0.3333  | 0.3366 | 0.24 | 0.4556  | 0.3056  | 0.3611  | 0.175 |
| 515 | rs1404996705 | 42862969 | 41491042 | C | T | intron_variant   | 0       | 0       | 0      | 0       | 0.005  | 0    | 0       | 0       | 0       | 0     |
| 516 | rs187208295  | 42863008 | 41491081 | C | T | intron_variant   | 0       | 0       | 0      | 0       | 0      | 0    | 0       | 0       | 0       | 0.025 |
| 517 | rs117656646  | 42863050 | 41491123 | C | T | intron_variant   | 0       | 0       | 0      | 0.01282 | 0.0297 | 0.02 | 0       | 0       | 0       | 0.025 |
| 518 | rs143270468  | 42863127 | 41491200 | A | G | intron_variant   | 0       | 0       | 0      | 0       | 0.005  | 0    | 0       | 0       | 0       | 0     |



|     |              |          |          |   |   |                    |         |         |        |         |        |      |         |         |         |       |
|-----|--------------|----------|----------|---|---|--------------------|---------|---------|--------|---------|--------|------|---------|---------|---------|-------|
| 554 | rs2838040    | 42864692 | 41492765 | G | A | intron_variant     | 0.07692 | 0.07692 | 0.4167 | 0.3205  | 0.3168 | 0.18 | 0.4889  | 0.2778  | 0.3333  | 0.125 |
| 555 | -            | 42864743 | 41492816 | A | G | intron_variant     | 0.2692  | 0.2692  | 0.3125 | 0.4487  | 0.4257 | 0.5  | 0.2556  | 0.4167  | 0.4907  | 0.475 |
| 556 | rs536023174  | 42864747 | 41492820 | T | C | intron_variant     | 0       | 0       | 0      | 0       | 0      | 0.02 | 0       | 0       | 0       | 0     |
| 557 | rs401371     | 42864812 | 41492885 | C | G | intron_variant     | 0.1923  | 0.1923  | 0.25   | 0.2179  | 0.2228 | 0.24 | 0.2444  | 0.2778  | 0.1574  | 0.225 |
| 558 | rs144988776  | 42864871 | 41492944 | T | C | intron_variant     | 0       | 0       | 0      | 0       | 0.0149 | 0    | 0.06667 | 0       | 0       | 0     |
| 559 | -            | 42864927 | 41493000 | A | G | intron_variant     | 0       | 0       | 0      | 0       | 0      | 0    | 0       | 0       | 0       | 0.025 |
| 560 | rs373940448  | 42864947 | 41493020 | T | G | intron_variant     | 0       | 0       | 0      | 0       | 0      | 0    | 0       | 0       | 0       | 0     |
| 561 | rs147138431  | 42865014 | 41493087 | A | C | intron_variant     | 0       | 0       | 0      | 0.01282 | 0.0099 | 0    | 0       | 0       | 0       | 0     |
| 562 | rs368086767  | 42865035 | 41493108 | A | G | intron_variant     | 0       | 0       | 0      | 0       | 0      | 0    | 0       | 0       | 0       | 0     |
| 563 | -            | 42865047 | 41493120 | C | T | intron_variant     | 0.3462  | 0.3462  | 0.1458 | 0.03846 | 0.0446 | 0.12 | 0.1889  | 0.5     | 0.4398  | 0     |
| 564 | -            | 42865151 | 41493224 | T | C | intron_variant     | 0.2692  | 0.2692  | 0.5    | 0.3718  | 0.3465 | 0.34 | 0.3444  | 0.3611  | 0.3426  | 0.125 |
| 565 | rs375827195  | 42865216 | 41493289 | G | A | intron_variant     | 0       | 0       | 0      | 0       | 0      | 0    | 0.01111 | 0       | 0       | 0.05  |
| 566 | rs186185630  | 42865275 | 41493348 | T | C | intron_variant     | 0       | 0       | 0      | 0       | 0      | 0    | 0       | 0       | 0       | 0     |
| 567 | -            | 42865283 | 41493356 | G | A | intron_variant     | 0       | 0       | 0      | 0       | 0.005  | 0.02 | 0       | 0       | 0       | 0     |
| 568 | -            | 42865300 | 41493373 | G | A | intron_variant     | 0       | 0       | 0      | 0       | 0.005  | 0    | 0       | 0       | 0       | 0     |
| 569 | -            | 42865324 | 41493397 | G | A | intron_variant     | 0.1538  | 0.1538  | 0.3542 | 0.2821  | 0.2871 | 0.46 | 0.4444  | 0.3333  | 0.4815  | 0.35  |
| 570 | rs1180926833 | 42865398 | 41493471 | C | T | intron_variant     | 0       | 0       | 0      | 0       | 0      | 0    | 0       | 0       | 0       | 0     |
| 571 | rs377011212  | 42865555 | 41493628 | T | C | intron_variant     | 0       | 0       | 0      | 0       | 0      | 0    | 0.02222 | 0       | 0       | 0     |
| 572 | rs566903241  | 42865789 | 41493862 | C | T | intron_variant     | 0       | 0       | 0      | 0       | 0      | 0    | 0       | 0       | 0       | 0     |
| 573 | rs549801931  | 42865820 | 41493893 | T | C | intron_variant     | 0       | 0       | 0      | 0       | 0      | 0    | 0       | 0       | 0       | 0     |
| 574 | rs1601585975 | 42865828 | 41493901 | G | C | intron_variant     | 0       | 0       | 0      | 0       | 0      | 0    | 0       | 0       | 0       | 0     |
| 575 | rs2838041    | 42865906 | 41493979 | C | G | intron_variant     | 0       | 0       | 0.0833 | 0.07692 | 0.0198 | 0.04 | 0       | 0       | 0.00926 | 0.05  |
| 576 | rs1000568527 | 42866068 | 41494141 | G | C | intron_variant     | 0       | 0       | 0      | 0       | 0      | 0    | 0       | 0       | 0       | 0     |
| 577 | rs376235035  | 42866099 | 41494172 | T | C | intron_variant     | 0       | 0       | 0      | 0       | 0.0198 | 0    | 0       | 0       | 0.0463  | 0     |
| 578 | rs2838042    | 42866107 | 41494180 | C | T | intron_variant     | 0.07692 | 0.07692 | 0.3333 | 0.2051  | 0.2327 | 0.18 | 0.4444  | 0.25    | 0.1343  | 0.25  |
| 579 | rs923545665  | 42866226 | 41494299 | C | G | intron_variant     | 0       | 0       | 0      | 0       | 0      | 0    | 0.01111 | 0       | 0       | 0     |
| 580 | rs373196115  | 42866232 | 41494305 | A | G | intron_variant     | 0       | 0       | 0      | 0       | 0      | 0    | 0       | 0.05556 | 0       | 0     |
| 581 | rs750152865  | 42866245 | 41494318 | A | G | intron_variant     | 0       | 0       | 0      | 0       | 0      | 0    | 0       | 0       | 0       | 0     |
| 582 | rs3787950    | 42866296 | 41494369 | C | T | synonymous_variant | 0       | 0       | 0.125  | 0.1538  | 0.0693 | 0.22 | 0.4     | 0.2222  | 0.06481 | 0.175 |
| 583 | rs61735792   | 42866332 | 41494405 | A | G | synonymous_variant | 0       | 0       | 0      | 0.01282 | 0.0099 | 0    | 0       | 0       | 0       | 0     |
| 584 | rs201679623  | 42866388 | 41494461 | C | A | missense_variant   | 0       | 0       | 0      | 0.01282 | 0      | 0    | 0       | 0       | 0.00463 | 0     |
| 585 | rs138651919  | 42866399 | 41494472 | A | G | missense_variant   | 0       | 0       | 0      | 0       | 0      | 0    | 0       | 0       | 0       | 0     |
| 586 | rs199824558  | 42866422 | 41494495 | A | G | synonymous_variant | 0       | 0       | 0      | 0       | 0      | 0.02 | 0       | 0       | 0       | 0     |
| 587 | rs201093031  | 42866423 | 41494496 | G | A | missense_variant   | 0       | 0       | 0      | 0       | 0      | 0    | 0.01111 | 0       | 0       | 0     |
| 588 | rs61735791   | 42866439 | 41494512 | T | C | missense_variant   | 0       | 0       | 0      | 0       | 0.005  | 0    | 0       | 0       | 0       | 0.025 |

|     |              |          |          |   |   |                    |         |         |        |         |        |      |         |         |         |       |
|-----|--------------|----------|----------|---|---|--------------------|---------|---------|--------|---------|--------|------|---------|---------|---------|-------|
| 589 | rs141685390  | 42866440 | 41494513 | C | G | synonymous_variant | 0       | 0       | 0      | 0       | 0      | 0    | 0.01111 | 0       | 0       | 0     |
| 590 | rs61735790   | 42866468 | 41494541 | C | T | missense_variant   | 0       | 0       | 0      | 0       | 0      | 0    | 0       | 0       | 0       | 0     |
| 591 | rs368773451  | 42866553 | 41494626 | C | T | intron_variant     | 0       | 0       | 0      | 0       | 0      | 0    | 0       | 0       | 0       | 0     |
| 592 | rs368625065  | 42866644 | 41494717 | A | G | intron_variant     | 0       | 0       | 0      | 0       | 0      | 0    | 0       | 0       | 0       | 0     |
| 593 | rs547701911  | 42866723 | 41494796 | C | T | intron_variant     | 0       | 0       | 0      | 0       | 0.005  | 0    | 0       | 0       | 0       | 0     |
| 594 | -            | 42866725 | 41494798 | T | C | intron_variant     | 0       | 0       | 0      | 0       | 0      | 0    | 0       | 0       | 0       | 0     |
| 595 | rs374203194  | 42866726 | 41494799 | A | G | intron_variant     | 0       | 0       | 0      | 0.01282 | 0      | 0    | 0       | 0       | 0       | 0     |
| 596 | rs569947342  | 42866868 | 41494941 | T | C | intron_variant     | 0       | 0       | 0      | 0       | 0      | 0    | 0       | 0       | 0.00463 | 0     |
| 597 | -            | 42866884 | 41494957 | A | T | intron_variant     | 0.03846 | 0.03846 | 0      | 0       | 0      | 0    | 0       | 0       | 0       | 0     |
| 598 | rs927713682  | 42866888 | 41494961 | T | C | intron_variant     | 0       | 0       | 0      | 0       | 0      | 0    | 0       | 0       | 0.00926 | 0     |
| 599 | -            | 42866891 | 41494964 | A | G | intron_variant     | 0       | 0       | 0      | 0       | 0      | 0    | 0       | 0.02778 | 0       | 0     |
| 600 | rs1007596550 | 42866974 | 41495047 | A | G | intron_variant     | 0       | 0       | 0      | 0       | 0      | 0    | 0.03333 | 0       | 0       | 0     |
| 601 | rs190899605  | 42867015 | 41495088 | C | T | intron_variant     | 0       | 0       | 0.0208 | 0       | 0      | 0.02 | 0       | 0       | 0       | 0     |
| 602 | -            | 42867175 | 41495248 | A | T | intron_variant     | 0       | 0       | 0      | 0       | 0      | 0    | 0       | 0       | 0.00463 | 0     |
| 603 | -            | 42867179 | 41495252 | T | C | intron_variant     | 0.03846 | 0.03846 | 0      | 0       | 0      | 0    | 0       | 0       | 0       | 0     |
| 604 | rs1307770905 | 42867237 | 41495310 | G | T | intron_variant     | 0       | 0       | 0      | 0       | 0      | 0    | 0       | 0.02778 | 0       | 0     |
| 605 | rs558991814  | 42867326 | 41495399 | C | G | intron_variant     | 0       | 0       | 0      | 0       | 0.005  | 0    | 0       | 0       | 0       | 0     |
| 606 | rs530471976  | 42867424 | 41495497 | T | C | intron_variant     | 0       | 0       | 0      | 0       | 0      | 0    | 0       | 0       | 0       | 0     |
| 607 | rs114911304  | 42867425 | 41495498 | A | G | intron_variant     | 0       | 0       | 0      | 0       | 0      | 0    | 0       | 0       | 0       | 0     |
| 608 | rs775158277  | 42867499 | 41495572 | C | T | intron_variant     | 0       | 0       | 0      | 0.02564 | 0      | 0    | 0       | 0       | 0       | 0.025 |
| 609 | rs58146697   | 42867667 | 41495740 | C | T | intron_variant     | 0       | 0       | 0.0208 | 0.01282 | 0.0248 | 0.06 | 0.01111 | 0.05556 | 0.03704 | 0     |
| 610 | -            | 42867719 | 41495792 | T | C | intron_variant     | 0       | 0       | 0      | 0       | 0      | 0    | 0.01111 | 0       | 0       | 0     |
| 611 | rs372453344  | 42867735 | 41495808 | T | C | intron_variant     | 0       | 0       | 0      | 0       | 0      | 0    | 0       | 0       | 0       | 0     |
| 612 | rs142425263  | 42867756 | 41495829 | A | C | intron_variant     | 0       | 0       | 0      | 0       | 0      | 0    | 0       | 0       | 0.01389 | 0     |
| 613 | rs184876485  | 42867990 | 41496063 | G | A | intron_variant     | 0       | 0       | 0      | 0.01282 | 0      | 0    | 0       | 0       | 0       | 0     |
| 614 | rs370530303  | 42868060 | 41496133 | T | C | intron_variant     | 0       | 0       | 0      | 0       | 0      | 0    | 0.04444 | 0       | 0       | 0     |
| 615 | rs55760462   | 42868206 | 41496279 | C | T | intron_variant     | 0.03846 | 0.03846 | 0.2083 | 0.2179  | 0.1881 | 0.06 | 0.04444 | 0.02778 | 0.1296  | 0.15  |
| 616 | -            | 42868299 | 41496372 | G | A | intron_variant     | 0       | 0       | 0      | 0       | 0      | 0    | 0.01111 | 0       | 0       | 0     |
| 617 | rs144276163  | 42868411 | 41496484 | G | T | intron_variant     | 0       | 0       | 0      | 0       | 0      | 0    | 0       | 0       | 0       | 0     |
| 618 | rs914184     | 42868641 | 41496714 | A | G | intron_variant     | 0       | 0       | 0.0208 | 0       | 0      | 0    | 0.01111 | 0       | 0.00926 | 0     |
| 619 | rs78217567   | 42868655 | 41496728 | C | T | intron_variant     | 0       | 0       | 0.0417 | 0       | 0.0446 | 0.02 | 0       | 0       | 0.00463 | 0     |
| 620 | -            | 42868820 | 41496893 | C | T | intron_variant     | 0       | 0       | 0      | 0       | 0      | 0    | 0       | 0       | 0       | 0     |
| 621 | rs34256269   | 42868876 | 41496949 | A | G | intron_variant     | 0       | 0       | 0.1667 | 0.1026  | 0.1485 | 0.18 | 0.1111  | 0.05556 | 0.0463  | 0.1   |
| 622 | COSV59828093 | 42868888 | 41496961 | C | T | intron_variant     | 0.3462  | 0.3462  | 0.3542 | 0.4487  | 0.495  | 0.34 | 0.4778  | 0.4444  | 0.4398  | 0.4   |
| 623 | -            | 42868905 | 41496978 | C | T | intron_variant     | 0       | 0       | 0      | 0       | 0      | 0    | 0.01111 | 0       | 0       | 0     |

|     |              |          |          |   |   |                |        |        |        |         |        |      |         |         |         |       |
|-----|--------------|----------|----------|---|---|----------------|--------|--------|--------|---------|--------|------|---------|---------|---------|-------|
| 624 | rs573213706  | 42868957 | 41497030 | A | G | intron_variant | 0      | 0      | 0      | 0       | 0.005  | 0    | 0       | 0       | 0       | 0     |
| 625 | -            | 42868992 | 41497065 | C | T | intron_variant | 0      | 0      | 0      | 0       | 0.0099 | 0    | 0       | 0       | 0       | 0     |
| 626 | rs34983238   | 42868997 | 41497070 | C | A | intron_variant | 0      | 0      | 0.0833 | 0.1538  | 0.0743 | 0.08 | 0       | 0       | 0.01389 | 0.25  |
| 627 | -            | 42869028 | 41497101 | G | A | intron_variant | 0      | 0      | 0      | 0       | 0      | 0    | 0       | 0       | 0.00463 | 0     |
| 628 | -            | 42869063 | 41497136 | A | G | intron_variant | 0.3462 | 0.3462 | 0.1875 | 0.3462  | 0.3564 | 0.16 | 0.3889  | 0.3889  | 0.3889  | 0.3   |
| 629 | -            | 42869080 | 41497153 | C | T | intron_variant | 0      | 0      | 0      | 0       | 0.005  | 0    | 0       | 0       | 0       | 0     |
| 630 | rs924332623  | 42869283 | 41497356 | A | C | intron_variant | 0      | 0      | 0      | 0       | 0      | 0    | 0       | 0       | 0       | 0     |
| 631 | rs1003030    | 42869606 | 41497679 | G | A | intron_variant | 0      | 0      | 0.25   | 0.141   | 0.1188 | 0.24 | 0.2333  | 0.2222  | 0.1389  | 0.2   |
| 632 | rs184859933  | 42869637 | 41497710 | T | C | intron_variant | 0      | 0      | 0      | 0       | 0      | 0    | 0       | 0       | 0       | 0     |
| 633 | rs56695953   | 42869735 | 41497808 | A | G | intron_variant | 0.2308 | 0.2308 | 0.0208 | 0.1923  | 0.1386 | 0.04 | 0.03333 | 0.02778 | 0.05556 | 0.175 |
| 634 | rs148901354  | 42869772 | 41497845 | T | C | intron_variant | 0      | 0      | 0      | 0.01282 | 0      | 0    | 0       | 0       | 0       | 0     |
| 635 | rs367885466  | 42869836 | 41497909 | T | C | intron_variant | 0      | 0      | 0      | 0       | 0      | 0    | 0       | 0       | 0       | 0     |
| 636 | rs181592444  | 42869927 | 41498000 | T | C | intron_variant | 0      | 0      | 0      | 0       | 0      | 0    | 0.01111 | 0.02778 | 0       | 0     |
| 637 | rs115968373  | 42869938 | 41498011 | A | G | intron_variant | 0      | 0      | 0      | 0       | 0      | 0    | 0       | 0       | 0       | 0     |
| 638 | rs186510586  | 42870205 | 41498278 | C | T | intron_variant | 0      | 0      | 0      | 0.01282 | 0      | 0    | 0       | 0       | 0       | 0     |
| 639 | -            | 42870211 | 41498284 | C | T | intron_variant | 0      | 0      | 0      | 0       | 0      | 0    | 0       | 0       | 0       | 0     |
| 640 | rs11701576   | 42870262 | 41498335 | G | A | intron_variant | 0      | 0      | 0.25   | 0.141   | 0.1188 | 0.24 | 0.2333  | 0.2222  | 0.1389  | 0.2   |
| 641 | rs780560155  | 42870392 | 41498465 | A | G | intron_variant | 0      | 0      | 0      | 0.01282 | 0      | 0    | 0       | 0       | 0       | 0     |
| 642 | rs138661151  | 42870421 | 41498494 | A | G | intron_variant | 0      | 0      | 0      | 0       | 0      | 0    | 0       | 0       | 0       | 0     |
| 643 | rs150715708  | 42870450 | 41498523 | T | C | intron_variant | 0      | 0      | 0      | 0.01282 | 0      | 0    | 0       | 0       | 0.00463 | 0     |
| 644 | rs557714443  | 42870451 | 41498524 | A | G | intron_variant | 0      | 0      | 0      | 0       | 0      | 0    | 0.01111 | 0       | 0       | 0     |
| 645 | rs3761373    | 42870522 | 41498595 | T | C | intron_variant | 0      | 0      | 0.25   | 0.141   | 0.1188 | 0.24 | 0.2333  | 0.2222  | 0.1389  | 0.2   |
| 646 | rs940625478  | 42870890 | 41498963 | G | T | intron_variant | 0      | 0      | 0      | 0       | 0.005  | 0    | 0       | 0       | 0       | 0     |
| 647 | rs913523407  | 42870902 | 41498975 | A | G | intron_variant | 0      | 0      | 0.0208 | 0       | 0      | 0    | 0       | 0       | 0       | 0     |
| 648 | rs422761     | 42870993 | 41499066 | A | G | intron_variant | 0.3846 | 0.3846 | 0.0833 | 0.02564 | 0.0693 | 0.26 | 0.2     | 0.3056  | 0.2778  | 0.075 |
| 649 | -            | 42871051 | 41499124 | G | A | intron_variant | 0      | 0      | 0      | 0       | 0      | 0    | 0       | 0       | 0       | 0     |
| 650 | rs1233077154 | 42871073 | 41499146 | T | C | intron_variant | 0      | 0      | 0      | 0       | 0      | 0    | 0       | 0       | 0       | 0     |
| 651 | rs939814881  | 42871083 | 41499156 | T | C | intron_variant | 0      | 0      | 0      | 0       | 0.005  | 0    | 0       | 0       | 0       | 0     |
| 652 | rs389001     | 42871131 | 41499204 | G | A | intron_variant | 0.3846 | 0.3846 | 0.0833 | 0.02564 | 0.0693 | 0.26 | 0.2     | 0.3056  | 0.2778  | 0.075 |
| 653 | rs931406088  | 42871153 | 41499226 | T | C | intron_variant | 0      | 0      | 0      | 0       | 0      | 0    | 0       | 0       | 0       | 0     |
| 654 | rs534034788  | 42871213 | 41499286 | A | G | intron_variant | 0      | 0      | 0      | 0       | 0      | 0.02 | 0       | 0       | 0       | 0     |
| 655 | rs2838043    | 42871220 | 41499293 | T | C | intron_variant | 0.2308 | 0.2308 | 0.0208 | 0.1923  | 0.1386 | 0.04 | 0.03333 | 0.02778 | 0.05556 | 0.175 |
| 656 | rs187648498  | 42871225 | 41499298 | C | T | intron_variant | 0      | 0      | 0      | 0       | 0      | 0    | 0       | 0       | 0       | 0     |
| 657 | rs372249693  | 42871227 | 41499300 | T | C | intron_variant | 0      | 0      | 0      | 0       | 0      | 0    | 0       | 0       | 0       | 0     |
| 658 | rs149424945  | 42871251 | 41499324 | T | C | intron_variant | 0      | 0      | 0      | 0       | 0      | 0    | 0       | 0.02778 | 0       | 0     |



|     |              |          |          |   |   |                |         |         |        |         |        |      |         |         |         |       |
|-----|--------------|----------|----------|---|---|----------------|---------|---------|--------|---------|--------|------|---------|---------|---------|-------|
| 694 | rs9980693    | 42873605 | 41501678 | A | G | intron_variant | 0       | 0       | 0.1667 | 0.1026  | 0.1535 | 0.16 | 0.1222  | 0.05556 | 0.0463  | 0.1   |
| 695 | rs73903405   | 42873700 | 41501773 | A | C | intron_variant | 0       | 0       | 0      | 0       | 0      | 0    | 0       | 0       | 0       | 0     |
| 696 | rs145877432  | 42873827 | 41501900 | A | G | intron_variant | 0       | 0       | 0      | 0       | 0      | 0    | 0       | 0       | 0       | 0     |
| 697 | -            | 42873984 | 41502057 | C | T | intron_variant | 0       | 0       | 0      | 0       | 0      | 0    | 0       | 0       | 0       | 0     |
| 698 | -            | 42874065 | 41502138 | A | G | intron_variant | 0       | 0       | 0.0208 | 0       | 0      | 0    | 0       | 0       | 0       | 0     |
| 699 | rs968067353  | 42874098 | 41502171 | A | G | intron_variant | 0       | 0       | 0      | 0       | 0      | 0    | 0       | 0.02778 | 0       | 0     |
| 700 | rs377403765  | 42874104 | 41502177 | A | G | intron_variant | 0       | 0       | 0      | 0       | 0      | 0    | 0       | 0       | 0       | 0     |
| 701 | rs149270377  | 42874184 | 41502257 | A | G | intron_variant | 0       | 0       | 0      | 0       | 0      | 0    | 0       | 0       | 0       | 0     |
| 702 | rs143460343  | 42874270 | 41502343 | A | G | intron_variant | 0       | 0       | 0      | 0       | 0      | 0    | 0       | 0       | 0       | 0     |
| 703 | rs141583878  | 42874306 | 41502379 | A | G | intron_variant | 0       | 0       | 0      | 0.01282 | 0      | 0    | 0       | 0       | 0       | 0     |
| 704 | rs567302726  | 42874338 | 41502411 | A | G | intron_variant | 0       | 0       | 0      | 0       | 0      | 0    | 0       | 0       | 0       | 0     |
| 705 | -            | 42874368 | 41502441 | G | A | intron_variant | 0.03846 | 0.03846 | 0      | 0       | 0.005  | 0    | 0       | 0       | 0       | 0     |
| 706 | -            | 42874384 | 41502457 | G | A | intron_variant | 0       | 0       | 0      | 0       | 0      | 0    | 0       | 0       | 0       | 0     |
| 707 | rs536147878  | 42874513 | 41502586 | A | G | intron_variant | 0       | 0       | 0      | 0       | 0.005  | 0    | 0       | 0       | 0       | 0     |
| 708 | rs992437148  | 42874535 | 41502608 | T | C | intron_variant | 0       | 0       | 0      | 0       | 0      | 0    | 0       | 0       | 0.00463 | 0     |
| 709 | rs146385718  | 42874559 | 41502632 | C | T | intron_variant | 0       | 0       | 0      | 0       | 0      | 0    | 0       | 0       | 0       | 0     |
| 710 | rs531756387  | 42874831 | 41502904 | T | G | intron_variant | 0       | 0       | 0.0208 | 0       | 0      | 0    | 0.01111 | 0       | 0       | 0     |
| 711 | rs139700775  | 42874841 | 41502914 | C | T | intron_variant | 0       | 0       | 0      | 0       | 0      | 0    | 0       | 0       | 0.00463 | 0     |
| 712 | -            | 42874844 | 41502917 | T | C | intron_variant | 0       | 0       | 0      | 0       | 0      | 0    | 0.01111 | 0       | 0       | 0     |
| 713 | rs9984012    | 42875004 | 41503077 | T | C | intron_variant | 0       | 0       | 0.1667 | 0.1026  | 0.1535 | 0.16 | 0.1222  | 0.05556 | 0.0463  | 0.1   |
| 714 | rs142914234  | 42875089 | 41503162 | C | T | intron_variant | 0       | 0       | 0      | 0       | 0      | 0    | 0       | 0       | 0       | 0     |
| 715 | rs1308693805 | 42875131 | 41503204 | T | C | intron_variant | 0       | 0       | 0      | 0       | 0      | 0    | 0       | 0       | 0.00463 | 0     |
| 716 | -            | 42875190 | 41503263 | A | G | intron_variant | 0       | 0       | 0      | 0       | 0.005  | 0    | 0       | 0       | 0       | 0     |
| 717 | rs420737     | 42875404 | 41503477 | G | A | intron_variant | 0.3846  | 0.3846  | 0.0833 | 0.02564 | 0.0693 | 0.26 | 0.2444  | 0.2778  | 0.2778  | 0.075 |
| 718 | rs146120690  | 42875620 | 41503693 | A | G | intron_variant | 0       | 0       | 0      | 0       | 0      | 0    | 0.08889 | 0       | 0       | 0     |
| 719 | rs74749793   | 42875652 | 41503725 | T | G | intron_variant | 0       | 0       | 0.25   | 0.141   | 0.1188 | 0.24 | 0.1889  | 0.1944  | 0.1389  | 0.2   |
| 720 | rs1033407344 | 42875668 | 41503741 | A | C | intron_variant | 0       | 0       | 0      | 0       | 0      | 0    | 0       | 0       | 0       | 0     |
| 721 | rs373052874  | 42875816 | 41503889 | C | G | intron_variant | 0       | 0       | 0      | 0       | 0      | 0    | 0.05556 | 0       | 0       | 0     |
| 722 | rs763295257  | 42875832 | 41503905 | A | G | intron_variant | 0       | 0       | 0      | 0       | 0.0099 | 0    | 0       | 0       | 0.00926 | 0     |
| 723 | -            | 42875847 | 41503920 | T | G | intron_variant | 0       | 0       | 0      | 0       | 0      | 0    | 0       | 0       | 0       | 0     |
| 724 | rs1381741328 | 42875859 | 41503932 | T | C | intron_variant | 0       | 0       | 0      | 0       | 0.005  | 0    | 0       | 0       | 0       | 0     |
| 725 | -            | 42876060 | 41504133 | C | T | intron_variant | 0       | 0       | 0      | 0       | 0      | 0    | 0       | 0       | 0       | 0.025 |
| 726 | rs575313753  | 42876148 | 41504221 | G | A | intron_variant | 0       | 0       | 0      | 0       | 0      | 0    | 0       | 0       | 0       | 0     |
| 727 | -            | 42876162 | 41504235 | C | T | intron_variant | 0       | 0       | 0      | 0       | 0      | 0    | 0       | 0       | 0       | 0.025 |
| 728 | rs7277080    | 42876400 | 41504473 | T | C | intron_variant | 0.03846 | 0.03846 | 0.3125 | 0.3846  | 0.3069 | 0.14 | 0.04444 | 0.02778 | 0.1435  | 0.325 |







**Supplementary Table 2:** Geographic region and numbers of samples examined in this study

| <b>Geographic Region</b>       | <b>Number of Samples (N)</b> |
|--------------------------------|------------------------------|
| America                        | 13                           |
| Central Asia                   | 24                           |
| Caucasus                       | 39                           |
| Europe                         | 101                          |
| <b>South Asia:-</b>            | 25                           |
| <i>Indo-European</i>           | 18                           |
| <i>Dravidian</i>               | 4                            |
| <i>Austroasiatic</i>           | 3                            |
| SEAM (Southeast Asia Mainland) | 18                           |
| SEAI (Southeast Asia Island)   | 45                           |
| Siberia                        | 108                          |
| West Asia                      | 20                           |

**Supplementary Table 3a.** Distribution of major haplotypes of Tmprss2 gene among the world population.

| <b>Haplotype No.</b> | <b>AMR</b> | <b>SIB</b> | <b>CA</b> | <b>EUR</b> | <b>SEAI</b> | <b>SEAM</b> | <b>SA</b> | <b>CAU</b> | <b>WA</b> |
|----------------------|------------|------------|-----------|------------|-------------|-------------|-----------|------------|-----------|
| <b>Hap_34</b>        | 0          | 2          | 3         | 0          | 3           | 1           | 1         | 0          | 0         |
| <b>Hap_48</b>        | 0          | 0          | 1         | 5          | 0           | 0           | 2         | 0          | 3         |
| <b>Hap_75</b>        | 0          | 4          | 0         | 12         | 0           | 0           | 0         | 2          | 0         |
| <b>Hap_98</b>        | 0          | 9          | 0         | 2          | 0           | 0           | 0         | 3          | 0         |
| <b>Hap_260</b>       | 0          | 17         | 0         | 0          | 3           | 0           | 1         | 0          | 0         |

**Supplementary Table 3b.** Frequency of haplotypes present in South Asia, among studied groups

| Haplotypes | AMR | SIB | CA | EUR | SEAI | SEAM | SA | CAU | WA | Total | AMR | SIB   | CA    | EUR   | SEAI  | SEAM  | SA    | CAU   | WA    |
|------------|-----|-----|----|-----|------|------|----|-----|----|-------|-----|-------|-------|-------|-------|-------|-------|-------|-------|
| Hap_34     | 0   | 2   | 3  | 0   | 3    | 1    | 1  | 0   | 0  | 10    | -   | 0.200 | 0.300 | -     | 0.300 | 0.100 | 0.100 | -     | -     |
| Hap_48     | 0   | 0   | 1  | 5   | 0    | 0    | 2  | 0   | 3  | 11    | -   | -     | 0.091 | 0.455 | -     | -     | 0.182 | -     | 0.273 |
| Hap_78     | 0   | 0   | 0  | 0   | 0    | 0    | 1  | 1   | 1  | 3     | -   | -     | -     | -     | -     | -     | 0.333 | 0.333 | 0.333 |
| Hap_112    | 0   | 0   | 0  | 0   | 0    | 0    | 1  | 1   | 0  | 2     | -   | -     | -     | -     | -     | -     | 0.500 | 0.500 | -     |
| Hap_219    | 0   | 0   | 0  | 1   | 0    | 0    | 2  | 0   | 0  | 3     | -   | -     | -     | 0.333 | -     | -     | 0.667 | -     | -     |
| Hap_245    | 0   | 0   | 0  | 0   | 0    | 0    | 1  | 0   | 0  | 1     | -   | -     | -     | -     | -     | -     | 1     | -     | -     |
| Hap_246    | 0   | 0   | 0  | 0   | 0    | 0    | 1  | 0   | 0  | 1     | -   | -     | -     | -     | -     | -     | 1     | -     | -     |
| Hap_247    | 0   | 0   | 0  | 0   | 0    | 0    | 1  | 0   | 0  | 1     | -   | -     | -     | -     | -     | -     | 1     | -     | -     |
| Hap_248    | 0   | 0   | 0  | 0   | 0    | 0    | 1  | 0   | 0  | 1     | -   | -     | -     | -     | -     | -     | 1     | -     | -     |
| Hap_249    | 0   | 0   | 0  | 0   | 0    | 0    | 1  | 0   | 0  | 1     | -   | -     | -     | -     | -     | -     | 1     | -     | -     |
| Hap_250    | 0   | 0   | 0  | 0   | 0    | 0    | 1  | 0   | 0  | 1     | -   | -     | -     | -     | -     | -     | 1     | -     | -     |
| Hap_251    | 0   | 0   | 0  | 0   | 0    | 0    | 1  | 0   | 0  | 1     | -   | -     | -     | -     | -     | -     | 1     | -     | -     |
| Hap_252    | 0   | 0   | 0  | 0   | 0    | 0    | 1  | 0   | 0  | 1     | -   | -     | -     | -     | -     | -     | 1     | -     | -     |
| Hap_253    | 0   | 0   | 0  | 0   | 0    | 0    | 1  | 0   | 0  | 1     | -   | -     | -     | -     | -     | -     | 1     | -     | -     |
| Hap_254    | 0   | 0   | 0  | 0   | 0    | 0    | 1  | 0   | 0  | 1     | -   | -     | -     | -     | -     | -     | 1     | -     | -     |
| Hap_255    | 0   | 0   | 0  | 0   | 0    | 0    | 1  | 0   | 0  | 1     | -   | -     | -     | -     | -     | -     | 1     | -     | -     |
| Hap_256    | 0   | 0   | 0  | 0   | 0    | 0    | 1  | 0   | 0  | 1     | -   | -     | -     | -     | -     | -     | 1     | -     | -     |
| Hap_257    | 0   | 0   | 0  | 0   | 0    | 0    | 1  | 0   | 0  | 1     | -   | -     | -     | -     | -     | -     | 1     | -     | -     |
| Hap_258    | 0   | 0   | 0  | 0   | 0    | 0    | 1  | 0   | 0  | 1     | -   | -     | -     | -     | -     | -     | 1     | -     | -     |
| Hap_259    | 0   | 0   | 0  | 0   | 0    | 0    | 1  | 0   | 0  | 1     | -   | -     | -     | -     | -     | -     | 1     | -     | -     |
| Hap_260    | 0   | 17  | 0  | 0   | 3    | 0    | 1  | 0   | 0  | 21    | -   | 0.810 | -     | -     | 0.143 | -     | 0.048 | -     | -     |
| Hap_261    | 0   | 0   | 0  | 0   | 0    | 0    | 1  | 0   | 0  | 1     | -   | -     | -     | -     | -     | -     | 1     | -     | -     |
| Hap_262    | 0   | 0   | 0  | 0   | 0    | 0    | 1  | 0   | 0  | 1     | -   | -     | -     | -     | -     | -     | 1     | -     | -     |
| Hap_263    | 0   | 0   | 0  | 0   | 0    | 0    | 1  | 0   | 0  | 1     | -   | -     | -     | -     | -     | -     | 1     | -     | -     |
| Hap_264    | 0   | 0   | 0  | 0   | 0    | 0    | 1  | 0   | 0  | 1     | -   | -     | -     | -     | -     | -     | 1     | -     | -     |
| Hap_265    | 0   | 0   | 0  | 0   | 0    | 0    | 1  | 0   | 0  | 1     | -   | -     | -     | -     | -     | -     | 1     | -     | -     |
| Hap_266    | 0   | 0   | 0  | 0   | 0    | 0    | 1  | 0   | 0  | 1     | -   | -     | -     | -     | -     | -     | 1     | -     | -     |
| Hap_267    | 0   | 0   | 0  | 0   | 0    | 0    | 1  | 0   | 0  | 1     | -   | -     | -     | -     | -     | -     | 1     | -     | -     |
| Hap_268    | 0   | 0   | 0  | 0   | 0    | 0    | 1  | 0   | 0  | 1     | -   | -     | -     | -     | -     | -     | 1     | -     | -     |
| Hap_269    | 0   | 0   | 0  | 0   | 0    | 0    | 1  | 0   | 0  | 1     | -   | -     | -     | -     | -     | -     | 1     | -     | -     |
| Hap_270    | 0   | 0   | 0  | 0   | 0    | 0    | 1  | 0   | 0  | 1     | -   | -     | -     | -     | -     | -     | 1     | -     | -     |
| Hap_271    | 0   | 0   | 0  | 0   | 0    | 0    | 2  | 0   | 0  | 2     | -   | -     | -     | -     | -     | -     | 1     | -     | -     |
| Hap_272    | 0   | 0   | 0  | 0   | 0    | 0    | 1  | 0   | 0  | 1     | -   | -     | -     | -     | -     | -     | 1     | -     | -     |
| Hap_273    | 0   | 0   | 0  | 0   | 0    | 0    | 1  | 0   | 0  | 1     | -   | -     | -     | -     | -     | -     | 1     | -     | -     |
| Hap_274    | 0   | 0   | 0  | 0   | 0    | 0    | 1  | 0   | 0  | 1     | -   | -     | -     | -     | -     | -     | 1     | -     | -     |
| Hap_275    | 0   | 0   | 0  | 0   | 0    | 0    | 1  | 0   | 0  | 1     | -   | -     | -     | -     | -     | -     | 1     | -     | -     |
| Hap_276    | 0   | 0   | 0  | 0   | 0    | 0    | 1  | 0   | 0  | 1     | -   | -     | -     | -     | -     | -     | 1     | -     | -     |
| Hap_277    | 0   | 0   | 0  | 0   | 0    | 0    | 1  | 0   | 0  | 1     | -   | -     | -     | -     | -     | -     | 1     | -     | -     |
| Hap_278    | 0   | 0   | 0  | 0   | 0    | 0    | 1  | 0   | 0  | 1     | -   | -     | -     | -     | -     | -     | 1     | -     | -     |
| Hap_279    | 0   | 0   | 0  | 0   | 0    | 0    | 1  | 0   | 0  | 1     | -   | -     | -     | -     | -     | -     | 1     | -     | -     |
| Hap_280    | 0   | 0   | 0  | 0   | 0    | 0    | 1  | 0   | 0  | 1     | -   | -     | -     | -     | -     | -     | 1     | -     | -     |
| Hap_281    | 0   | 0   | 0  | 0   | 0    | 0    | 1  | 0   | 0  | 1     | -   | -     | -     | -     | -     | -     | 1     | -     | -     |
| Hap_282    | 0   | 0   | 0  | 0   | 0    | 0    | 1  | 0   | 0  | 1     | -   | -     | -     | -     | -     | -     | 1     | -     | -     |
| Hap_283    | 0   | 0   | 0  | 0   | 0    | 0    | 1  | 0   | 0  | 1     | -   | -     | -     | -     | -     | -     | 1     | -     | -     |
| Hap_284    | 0   | 0   | 0  | 0   | 0    | 0    | 1  | 0   | 0  | 1     | -   | -     | -     | -     | -     | -     | 1     | -     | -     |
| Hap_285    | 0   | 0   | 0  | 0   | 0    | 0    | 1  | 0   | 0  | 1     | -   | -     | -     | -     | -     | -     | 1     | -     | -     |
| Hap_286    | 0   | 0   | 0  | 0   | 0    | 0    | 1  | 0   | 0  | 1     | -   | -     | -     | -     | -     | -     | 1     | -     | -     |

**Supplementary Table 4a.** Statewise allele frequency of studied SNP for the association

| State              | Population Groups        | Sample Size(N) | rs2070788(G) | rs734056(A) | rs12329760(T) | rs2276205(G) | rs3787950(C) | References                            |
|--------------------|--------------------------|----------------|--------------|-------------|---------------|--------------|--------------|---------------------------------------|
| Arunanchal Pradesh | Nyshi_Bom_Mro_Oraon      | 28             | 0.2143       | 0.125       | 0.3214        | 0.05357      | 0.1607       | present study                         |
| Bihar              | Brahmin Bihar            | 8              | 0.5          | 0.4375      | 0.3125        | 0.125        | 0.0625       | present study                         |
| Gujarat            | Gujarati and Brahmin_Guj | 121            | 0.4835       | 0.5         | 0.1694        | 0.03719      | 0.2521       | 1000 Genome                           |
| Haryana            | Ror and Brahmin_Har      | 18             | 0.3056       | 0.3056      | 0.3333        | 0.1471       | 0.1765       | Pathak et al. 2018                    |
| Jharkhand          | Santhal and Oraon        | 51             | 0.3137       | 0.2059      | 0.3431        | 0.01961      | 0.2843       | present study                         |
| Kerala             | Cochin_Jews              | 8              | 0.25         | 0.1875      | 0.0625        | 0            | 0            | present study                         |
| Meghalaya          | Garo and Khasi           | 16             | 0.4062       | 0           | 0.1562        | 0.09375      | 0.1875       | Tatte et al. 2019 and present study   |
| Rajasthan          | Gujjar                   | 15             | 0.4          | 0.3667      | 0.3667        | 0.1          | 0.2          | Pathak et al. 2018                    |
| Tamilnadu          | Brahmins_TN              | 15             | 0.4333       | 0.4667      | 0.3           | 0.06667      | 0.2667       | 1000 Genome and present study         |
| Tripura            | Tripuri                  | 20             | 0.3          | 0.05        | 0.175         | 0.1          | 0.025        | present study                         |
| Uttar Pradesh      | Brahmins and Kshatriya   | 89             | 0.483        | 0.4494      | 0.2303        | 0.0618       | 0.1818       | present study                         |
| West Bengal        | Bengali and Brahmin_WB   | 19             | 0.4737       | 0.4211      | 0.1579        | 0.07895      | 0.2105       | present study                         |
| Maharashtra        | Maratha and Mumbai Jews  | 13             | 0.3846       | 0.3077      | 0.3462        | 0.1154       | 0.2308       | Chaubey et al. 2017 and present study |
| Manipur            | Manipuri Brahmin         | 29             | 0.475        | 0.2895      | 0.25          | 0.1          | 0.2          | present study                         |

**Supplementary Table 4b.** Statewise epidemiological data of cases, deaths and CFR.

| State              | (June_2021) |        |             | (July_2021) |        |             | (August_2021) |        |            |
|--------------------|-------------|--------|-------------|-------------|--------|-------------|---------------|--------|------------|
|                    | Cases       | Death  | CFR         | Cases       | Death  | CFR         | Cases         | Death  | CFR        |
| Arunanchal Pradesh | 30850       | 138    | 0.004473258 | 41646       | 197    | 0.004730346 | 50070         | 242    | 0.00483323 |
| Bihar              | 716296      | 9466   | 0.013215207 | 723695      | 9625   | 0.013299802 | 725192        | 9646   | 0.01330131 |
| Gujarat            | 819376      | 9985   | 0.012186103 | 824384      | 10074  | 0.012220033 | 825045        | 10077  | 0.01221388 |
| Haryana            | 765096      | 8904   | 0.011637755 | 769417      | 9578   | 0.012448386 | 770079        | 9649   | 0.01252988 |
| Jharkhand          | 343065      | 5082   | 0.014813519 | 346533      | 5120   | 0.014774928 | 347392        | 5130   | 0.01476718 |
| Kerala             | 2702823     | 10804  | 0.003997302 | 3117083     | 15025  | 0.004820212 | 3552525       | 17747  | 0.0049956  |
| Meghalaya          | 41100       | 714    | 0.017372263 | 56052       | 926    | 0.016520374 | 69171         | 1163   | 0.0168134  |
| Rajasthan          | 949008      | 8799   | 0.009271787 | 953257      | 8947   | 0.009385717 | 953827        | 8954   | 0.00938745 |
| Tamilnadu          | 2324597     | 28906  | 0.012434844 | 2528806     | 33606  | 0.013289276 | 2575308       | 34317  | 0.0133254  |
| Tripura            | 58521       | 604    | 0.010321081 | 72860       | 722    | 0.009909415 | 80211         | 770    | 0.00959968 |
| Uttar Pradesh      | 1701668     | 21667  | 0.012732801 | 1707655     | 22705  | 0.013296011 | 1708772       | 22773  | 0.01332711 |
| West Bengal        | 1452987     | 16731  | 0.0115149   | 1515599     | 17970  | 0.011856698 | 1533803       | 18229  | 0.01188484 |
| Maharashtra        | 5887853     | 106367 | 0.018065499 | 6189257     | 126560 | 0.020448335 | 6353328       | 133996 | 0.02109068 |
| Manipur            | 58768       | 944    | 0.016063164 | 81560       | 1340   | 0.016429622 | 104324        | 1650   | 0.01581611 |

**Supplementary Table 5.** Results of the tests performed for statistical significance.

| <b>Observation</b> | <b>Linear regression analysis parameters</b> |                |                                         |                                   |
|--------------------|----------------------------------------------|----------------|-----------------------------------------|-----------------------------------|
| <b>rs2070788</b>   | <b>R<sup>2</sup></b>                         | <b>p-value</b> | <b>Effect size (<math>\beta</math>)</b> | <b>Std. Error (S<sub>e</sub>)</b> |
| June 2021_CFR      | 0.338                                        | 0.029          | 0.582                                   | 0.080467                          |
| July 2021_CFR      | 0.310                                        | 0.039          | 0.557                                   | 0.082181                          |
| August 2021_CFR    | 0.289                                        | 0.047          | 0.537                                   | 0.083416                          |

| <b>Observation</b> | <b>Linear regression analysis parameters</b> |                |                                         |                                   |
|--------------------|----------------------------------------------|----------------|-----------------------------------------|-----------------------------------|
| <b>rs734056</b>    | <b>R<sup>2</sup></b>                         | <b>p-value</b> | <b>Effect size (<math>\beta</math>)</b> | <b>Std. Error (S<sub>e</sub>)</b> |
| June 2021_CFR      | 0.011                                        | 0.720          | 0.105                                   | 0.165511                          |
| July 2021_CFR      | 0.028                                        | 0.570          | 0.166                                   | 0.164118                          |
| August 2021_CFR    | 0.026                                        | 0.580          | 0.162                                   | 0.164237                          |

| <b>Observation</b> | <b>Linear regression analysis parameters</b> |                |                                         |                                   |
|--------------------|----------------------------------------------|----------------|-----------------------------------------|-----------------------------------|
| <b>rs12329760</b>  | <b>R<sup>2</sup></b>                         | <b>p-value</b> | <b>Effect size (<math>\beta</math>)</b> | <b>Std. Error (S<sub>e</sub>)</b> |
| June 2021_CFR      | 0.056                                        | 0.417          | 0.236                                   | 0.095090                          |
| July 2021_CFR      | 0.079                                        | 0.330          | 0.281                                   | 0.093903                          |
| August 2021_CFR    | 0.081                                        | 0.324          | 0.284                                   | 0.093807                          |

| <b>Observation</b> | <b>Linear regression analysis parameters</b> |                |                                         |                                   |
|--------------------|----------------------------------------------|----------------|-----------------------------------------|-----------------------------------|
| <b>rs2276205</b>   | <b>R<sup>2</sup></b>                         | <b>p-value</b> | <b>Effect size (<math>\beta</math>)</b> | <b>Std. Error (S<sub>e</sub>)</b> |
| June 2021_CFR      | 0.183                                        | 0.127          | 0.428                                   | 0.038890                          |
| July 2021_CFR      | 0.190                                        | 0.120          | 0.435                                   | 0.038743                          |
| August 2021_CFR    | 0.184                                        | 0.126          | 0.429                                   | 0.038880                          |

| <b>Observation</b> | <b>Linear regression analysis parameters</b> |                |                                         |                                   |
|--------------------|----------------------------------------------|----------------|-----------------------------------------|-----------------------------------|
| <b>rs3787950</b>   | <b>R<sup>2</sup></b>                         | <b>p-value</b> | <b>Effect size (<math>\beta</math>)</b> | <b>Std. Error (S<sub>e</sub>)</b> |
| June 2021_CFR      | 0.265                                        | 0.060          | 0.515                                   | 0.077517                          |
| July 2021_CFR      | 0.278                                        | 0.053          | 0.527                                   | 0.076816                          |
| August 2021_CFR    | 0.280                                        | 0.052          | 0.529                                   | 0.076711                          |

**Supplementary Table 6:** Aggregate haplotypes frequency carrying rs2070788 (G allele).

|                        | <b>AMR</b> | <b>CA</b> | <b>CAU</b> | <b>EUR</b> | <b>SA</b> | <b>SEAI</b> | <b>SEAM</b> | <b>SIB</b> | <b>WA</b> |
|------------------------|------------|-----------|------------|------------|-----------|-------------|-------------|------------|-----------|
| <b>Haplotype Freq.</b> | 0.654      | 0.354     | 0.474      | 0.426      | 0.560     | 0.322       | 0.389       | 0.486      | 0.6       |

**Supplementary Table 7 |** rs2070788 frequency from gnomAD and 1000 genome database.

| <b>Region</b> | <b>gnomAD</b>          |                        | <b>1000 genome</b>     |                        |
|---------------|------------------------|------------------------|------------------------|------------------------|
|               | <b>Ref. Allele (G)</b> | <b>Alt. Allele (A)</b> | <b>Ref. Allele (G)</b> | <b>Alt. Allele (A)</b> |
| African       | 0.3035                 | 0.6965                 | 0.2738                 | 0.7262                 |
| East Asian    | 0.3482                 | 0.6518                 | 0.3562                 | 0.6438                 |
| Europe        | 0.467                  | 0.5330                 | 0.4642                 | 0.5358                 |
| American      | 0.5039                 | 0.4961                 | 0.494                  | 0.506                  |
| South Asian   | 0.444                  | 0.5560                 | 0.466                  | 0.534                  |
